# Supplementary material for: Ankyrin domains across the Tree of Life
Source: PubMed Central journal article supplement (PMC3932732; doi:10.7717/peerj.264), 2014-02-06
Supplement: peerj-02-264-s006.pdf [file peerj-02-264-s006.pdf]

| Lifestyle                                 | Genome                                                           | Class/Order                               | Ankryin proteins | Total Gene # | % Genome |
|-------------------------------------------|------------------------------------------------------------------|-------------------------------------------|------------------|--------------|----------|
| Extracellular                             | <i>Xanthomonas campestris</i> 8004                               | Gammaproteobacteria; Xanthomonadales      | 9                | 4,227        | 0.213    |
|                                           | <i>Ralstonia solanacearum</i> PSI07                              | Betaproteobacteria; Burkholderiales       | 8                | 7,457        | 0.107    |
|                                           | <i>Geobacter</i> sp. M21                                         | Deltaproteobacteria; Desulfuromonadales   | 7                | 4,204        | 0.167    |
|                                           | <i>Myxococcus xanthus</i> DK 1622                                | Deltaproteobacteria; Myxococcales         | 7                | 6,781        | 0.103    |
|                                           | <i>Hahella chejuensis</i> KCTC 2396                              | Gammaproteobacteria; Oceanospirillales    | 6                | 6,273        | 0.096    |
|                                           | <i>Bacillus cereus</i> E33L                                      | Bacilli; Bacillales                       | 5                | 5,796        | 0.086    |
|                                           | <i>Acinetobacter baumannii</i> 1656-2                            | Gammaproteobacteria; Pseudomonadales      | 4                | 3,913        | 0.102    |
|                                           | <i>Actinomyces graevenitzi</i> C83                               | Actinobacteria; Actinobacteridae          | 4                | 1,910        | 0.209    |
|                                           | <i>Agrobacterium radiobacter</i> K84                             | Alphaproteobacteria; Rhizobiales          | 4                | 6,820        | 0.059    |
|                                           | <i>Anabaena variabilis</i> ATCC 29413                            | Nostocales; Nostocaceae                   | 4                | 5697         | 0.070    |
|                                           | <i>Chitinophaga pinensis</i> DSM 2588                            | Bacteroidetes; Sphingobacteriia           | 6                | 7,399        | 0.081    |
|                                           | <i>Coraliomargarita akajimensis</i> DSM 45221                    | Verrucomicrobia; Opitutae                 | 4                | 3,192        | 0.125    |
|                                           | <i>Deferribacter desulfuricans</i> SSM1                          | Deferribacteres; Deferribacterales        | 5                | 2,442        | 0.205    |
|                                           | <i>Deinococcus gobiensis</i> I-0                                 | Deinococci; Deinococcales                 | 5                | 4,465        | 0.112    |
|                                           | <i>Gemmatimonas aurantiaca</i> T-27                              | Gemmatimonadetes; Gemmatimonadales        | 8                | 3,989        | 0.201    |
|                                           | <i>Persephonella marina</i> EX-H1                                | Aquificae; Aquificales;                   | 4                | 2,095        | 0.191    |
|                                           | <i>Phycisphaera mikurensis</i> NBRC 102666                       | Phycisphaerae; Phycisphaerales            | 4                | 3,334        | 0.120    |
| <i>Planctomyces brasiliensis</i> DSM 5305 | Planctomycetia; Planctomycetales                                 | 4                                         | 4,865            | 0.082        |          |
| <i>Spirochaeta africana</i>               | Spirochaetia; Spirochaetales                                     | 4                                         | 2,873            | 0.139        |          |
| <i>Sulfuricurvum kujijense</i> DSM 16994  | Epsilonproteobacteria; Campylobacteriales                        | 5                                         | 2,879            | 0.174        |          |
| <i>Trichodesmium erythraeum</i> IMS101    | Oscillatoriales; Trichodesmium                                   | 4                                         | 5076             | 0.079        |          |
| Facultative                               | <i>Burkholderia vietnamiensis</i> G4                             | Betaproteobacteria; Burkholderiales       | 37               | 7,775        | 0.476    |
|                                           | <i>Legionella pneumophila</i> Philadelphia 1                     | Gammaproteobacteria; Legionellales        | 15               | 2,942        | 0.510    |
|                                           | <i>Leptospira biflexa</i> serovar Patoc strain 'Patoc 1 (Paris)' | Spirochaetia; Spirochaetales              | 15               | 3,775        | 0.397    |
|                                           | <i>Helicobacter hepaticus</i> ATCC 51449                         | Epsilonproteobacteria; Campylobacteriales | 13               | 1,916        | 0.678    |
|                                           | <i>Francisella</i> cf. <i>novicida</i> 3523                      | Gammaproteobacteria; Thiotrichales        | 5                | 1,898        | 0.263    |
|                                           | <i>Bacteriovorax marinus</i> SJ                                  | Deltaproteobacteria; Bdellovibrionales    | 4                | 3,292        | 0.122    |
|                                           | <i>Elusimicrobium minutum</i>                                    | Elusimicrobia; Elusimicrobiales           | 5                | 1,599        | 0.313    |
|                                           | <i>Francisella</i> cf. <i>novicida</i> 3523                      | Gammaproteobacteria; Thiotrichales        | 5                | 1898         | 0.263    |
| <i>Shigella flexneri</i> 2002017          | Gammaproteobacteria; Enterobacteriales                           | 4                                         | 5,058            | 0.079        |          |
| Obligate                                  | <i>Wolbachia pipientis</i> wMel                                  | Alphaproteobacteria; Rickettsiales        | 24               | 1,308        | 1.835    |
|                                           | <i>Cardinium hertigii</i> cEper1                                 | Bacteroidetes; Bacteroidales              | 19               | 879          | 2.162    |
|                                           | <i>Coxiella burnetii</i> Dugway 7E9-12                           | Gammaproteobacteria; Legionellales        | 16               | 2,296        | 0.697    |
|                                           | <i>Candidatus</i> <i>Protochlamydia amoebophila</i> UWE25        | Chlamydiae; Chlamydiai                    | 6                | 2,031        | 0.295    |
|                                           | <i>Treponema pallidum pallidum</i> Nichols                       | Spirochaetia; Spirochaetales              | 2                | 1,095        | 0.183    |
|                                           | <i>Acaryochloris marina</i> MBIC11017                            | Chroococcales; Acaryochloris              | 12               | 8,571        | 0.140    |
