# Supplementary material for: Ankyrin domains across the Tree of Life
Source: PubMed Central journal article supplement (PMC3932732; doi:10.7717/peerj.264), 2014-02-06
Supplement: peerj-02-264-s007.pdf [file peerj-02-264-s007.pdf]

| <b>Obligate Intracellular Bacteria</b>                          | <b>Transmission</b> | <b># Ankryin proteins</b> | <b>Total Protein</b> | <b>% Proteins with Ank</b> |
|-----------------------------------------------------------------|---------------------|---------------------------|----------------------|----------------------------|
| Anaplasma marginale str. St. Maries                             | H                   | 3                         | 948                  | 0.3164557                  |
| Anaplasma phagocytophilum HZ                                    | H                   | 4                         | 1264                 | 0.3164557                  |
| Candidatus Protochlamydia amoebophila UWE25                     | H                   | 6                         | 2031                 | 0.29542097                 |
| Candidatus Ruthia magnifica str. Cm (Calyptogenia magnifica)    | H                   | 0                         |                      | 0                          |
| Chlamydophila pneumoniae AR39                                   | H                   | 0                         |                      | 0                          |
| Chlamydophila pneumoniae J138                                   | H                   | 0                         |                      | 0                          |
| Chlamydophila pneumoniae TW-183                                 | H                   | 0                         |                      | 0                          |
| Chlamydia trachomatis A/HAR-13                                  | H                   | 0                         |                      | 0                          |
| Chlamydophila caviae GPIC                                       | H                   | 0                         |                      | 0                          |
| Coxiella burnetii CbuG_Q212                                     | H                   | 9                         | 1866                 | 0.48231511                 |
| Coxiella burnetii CbuK_Q154                                     | H                   | 10                        | 1942                 | 0.51493306                 |
| Coxiella burnetii Dugway 5J108-111                              | H                   | 16                        | 2045                 | 0.78239609                 |
| Ehrlichia canis str. Jake                                       | H                   | 5                         | 925                  | 0.54054054                 |
| Ehrlichia chaffeensis str. Arkansas                             | H                   | 5                         | 1105                 | 0.45248869                 |
| Ehrlichia ruminantium str. Gardel                               | H                   | 5                         | 950                  | 0.52631579                 |
| Ehrlichia ruminantium str. Welgevonden                          | H                   | 4                         | 958                  | 0.41753653                 |
| Ehrlichia ruminantium str. Welgevonden                          | H                   | 4                         | 888                  | 0.45045045                 |
| Lawsonia intracellularis PHE/MN1-00                             | H                   | 0                         |                      | 0                          |
| Mycobacterium leprae TN                                         | H                   | 0                         |                      | 0                          |
| Mycoplasma capricolum subsp. capricolum ATCC 27343              | H                   | 0                         |                      | 0                          |
| Mycoplasma mycoides subsp. mycoides SC str. PG1                 | H                   | 0                         |                      | 0                          |
| Neorickettsia sennetsu str. Miyayama                            | H                   | 3                         | 932                  | 0.32188841                 |
| Onion yellows phytoplasma OY-M                                  | H                   | 0                         |                      | 0                          |
| Rickettsia bellii RML369-C                                      | H                   | 27                        | 1429                 | 1.88943317                 |
| Rickettsia conorii str. Malish 7                                | H                   | 6                         | 1374                 | 0.43668122                 |
| Rickettsia felis URRWXCal2                                      | H                   | 24                        | 1512                 | 1.58730159                 |
| Rickettsia prowazekii str. Madrid E                             | H                   | 3                         | 835                  | 0.35928144                 |
| Rickettsia typhi str. Wilmington                                | H                   | 2                         | 837                  | 0.23894863                 |
| Tropheryma whipplei str. Twist                                  | H                   | 0                         |                      | 0                          |
| Tropheryma whipplei TW08/27                                     | H                   | 0                         |                      | 0                          |
| Wolbachia endosymbiont of Drosophila melanogaster               | H                   | 24                        | 1195                 | 2.0083682                  |
| Baumannia cicadellinicola str. Hc (Homalodisca coagulata)       | V                   | 0                         |                      | 0                          |
| Buchnera aphidicola str. Bp (Baizongia pistaciae)               | V                   | 0                         |                      | 0                          |
| Buchnera aphidicola str. Sg (Schizaphis graminum)               | V                   | 0                         |                      | 0                          |
| Buchnera aphidicola str. APS (Acyrtosiphon pisum)               | V                   | 0                         |                      | 0                          |
| Candidatus Blochmannia floridanus                               | V                   | 0                         |                      | 0                          |
| Candidatus Blochmannia pennsylvanicus str. BPEN                 | V                   | 0                         |                      | 0                          |
| Wigglesworthia glossinidia endosymbiont of Glossina brevipalpis | V                   | 0                         |                      | 0                          |
| Wolbachia endosymbiont strain TRS of Brugia malayi              | V                   | 7                         | 805                  | 0.86956522                 |
