# Supplementary material for: Ankyrin domains across the Tree of Life
Source: PubMed Central journal article supplement (PMC3932732; doi:10.7717/peerj.264), 2014-02-06
Supplement: peerj-02-264-s008.pdf [file peerj-02-264-s008.pdf]

| Lifestyle     | Genome                                                           | Class/Order                                     | Ankryin proteins | Total Gene Number | % Genome |
|---------------|------------------------------------------------------------------|-------------------------------------------------|------------------|-------------------|----------|
| Extracellular | <i>Xanthomonas campestris</i> 8004                               | <i>Gammaproteobacteria; Xanthomonadales</i>     | 9                | 4,227             | 0.213    |
|               | <i>Ralstonia solanacearum</i> PSI07                              | <i>Betaproteobacteria; Burkholderiales</i>      | 8                | 7,457             | 0.107    |
|               | <i>Geobacter</i> sp. M21                                         | <i>Deltaproteobacteria; Desulfuromonadales</i>  | 7                | 4,204             | 0.167    |
|               | <i>Myxococcus xanthus</i> DK 1622                                | <i>Deltaproteobacteria; Myxococcales</i>        | 7                | 6,781             | 0.103    |
|               | <i>Hahella chejuensis</i> KCTC 2396                              | <i>Gammaproteobacteria; Oceanospirillales</i>   | 6                | 6,273             | 0.096    |
|               | <i>Bacillus cereus</i> E33L                                      | <i>Bacilli; Bacillales</i>                      | 5                | 5,796             | 0.086    |
| Facultative   | <i>Burkholderia vietnamiensis</i> G4                             | <i>Betaproteobacteria; Burkholderiales</i>      | 37               | 7,775             | 0.476    |
|               | <i>Legionella pneumophila</i> Philadelphia 1                     | <i>Gammaproteobacteria; Legionellales</i>       | 15               | 2,942             | 0.510    |
|               | <i>Leptospira biflexa</i> serovar Patoc strain 'Patoc 1 (Paris)' | <i>Spirochaetia; Spirochaetales</i>             | 15               | 3,775             | 0.397    |
|               | <i>Helicobacter hepaticus</i> ATCC 51449                         | <i>Epsilonproteobacteria; Campylobacterales</i> | 13               | 1,916             | 0.678    |
|               | <i>Francisella</i> cf. <i>novicida</i> 3523                      | <i>Gammaproteobacteria; Thiotrichales</i>       | 5                | 1,898             | 0.263    |
| Obligate      | <i>Wolbachia pipientis</i> wMel                                  | <i>Alphaproteobacteria; Rickettsiales</i>       | 24               | 1,308             | 1.835    |
|               | <i>Cardinium hertigii</i> cEper1                                 | <i>Bacteroidetes; Bacteroidales</i>             | 19               | 879               | 2.162    |
|               | <i>Coxiella burnetii</i> Dugway 7E9-12                           | <i>Gammaproteobacteria; Legionellales</i>       | 16               | 2,296             | 0.697    |
|               | <i>Candidatus Protochlamydia amoebophila</i> UWE25               | <i>Chlamydiae; Chlamydiia</i>                   | 6                | 2,031             | 0.295    |
|               | <i>Treponema pallidum pallidum</i> Nichols                       | <i>Spirochaetia; Spirochaetales</i>             | 2                | 1,095             | 0.183    |
