# Supplementary material for: Ankyrin domains across the Tree of Life
Source: PubMed Central journal article supplement (PMC3932732; doi:10.7717/peerj.264), 2014-02-06
Supplement: peerj-02-264-s010.pdf [file peerj-02-264-s010.pdf]

| <b>Archaea</b>                               | <b># Ankryin proteins</b> | <b>Total Protein #</b> | <b>% Proteins</b> |
|----------------------------------------------|---------------------------|------------------------|-------------------|
| <i>Acidianus hospitalis</i> W1               | 1                         | 2329                   | 0.043             |
| <i>Halogeometricum borinquense</i> DSM 11551 | 4                         | 3880                   | 0.103             |
| <i>Metallosphaera cuprina</i> Ar-4           | 1                         | 2029                   | 0.049             |
| <i>Methanocella paludicola</i> SANA E        | 2                         | 3004                   | 0.067             |
| <i>Methanococcus aeolicus</i> Nankai-3       | 1                         | 1490                   | 0.067             |
| <i>Methanosarcina barkeri</i> str. Fusaro    | 1                         | 3624                   | 0.028             |
| <i>Methanosarcina mazei</i> Go1              | 1                         | 3368                   | 0.030             |
| <i>Methanothermococcus okinawensis</i> IH1   | 1                         | 1595                   | 0.063             |
| <i>Pyrobaculum aerophilum</i> str. IM2       | 1                         | 2604                   | 0.038             |
| <i>Pyrobaculum arsenaticum</i> DSM 13514     | 1                         | 2299                   | 0.043             |
| <i>Pyrobaculum oguniense</i> TE7             | 6                         | 2835                   | 0.212             |
| <i>Sulfolobus islandicus</i> Y.N.15.51       | 2                         | 2900                   | 0.069             |
| <i>Thermofilum pendens</i> Hrk 5             | 1                         | 1878                   | 0.053             |
| <i>Thermoplasma acidophilum</i> DSM 1728     | 1                         | 1484                   | 0.067             |
| <i>Thermoplasma volcanium</i> GSS1           | 1                         | 1501                   | 0.067             |
