# Supplementary material for: Ankyrin domains across the Tree of Life
Source: PubMed Central journal article supplement (PMC3932732; doi:10.7717/peerj.264), 2014-02-06
Supplement: peerj-02-264-s011.pdf [file peerj-02-264-s011.pdf]

| <i>B. hyodysenteriae</i><br>gene | # ANK<br>repeats | Signal<br>Peptide | TM Domain |
|----------------------------------|------------------|-------------------|-----------|
| BHWA1_00072                      | 19               | ✓                 |           |
| BHWA1_00104                      | 5                |                   |           |
| BHWA1_00107                      | 12               |                   |           |
| BHWA1_00116                      | 11               | ✓                 |           |
| BHWA1_00208                      | 7                | ✓                 |           |
| BHWA1_00209                      | 9                | ✓                 |           |
| BHWA1_00220                      | 4                |                   |           |
| BHWA1_00221                      | 14               |                   |           |
| BHWA1_00248                      | 10               | ✓                 |           |
| BHWA1_00249                      | 16               | ✓                 |           |
| BHWA1_00295                      | 5                | ✓                 |           |
| BHWA1_00303                      | 15               |                   |           |
| BHWA1_00361                      | 6                | ✓                 |           |
| BHWA1_00390                      | 2                | ✓                 |           |
| BHWA1_00408                      | 14               |                   | ✓ (1)     |
| BHWA1_00479                      | 3                |                   |           |
| BHWA1_00480                      | 2                | ✓                 |           |
| BHWA1_00481                      | 5                | ✓                 |           |
| BHWA1_00591                      | 8                | ✓                 |           |
| BHWA1_00593                      | 10               |                   | ✓ (1)     |
| BHWA1_00594                      | 5                |                   |           |
| BHWA1_00595                      | 2                | ✓                 |           |
| BHWA1_00596                      | 8                | ✓                 |           |
| BHWA1_00684                      | 6                | ✓                 |           |
| BHWA1_00734                      | 3                |                   |           |
| BHWA1_00794                      | 5                | ✓                 |           |
| BHWA1_00854                      | 9                | ✓                 |           |
| BHWA1_00980                      | 16               |                   |           |
| BHWA1_00981                      | 17               |                   |           |
| BHWA1_01036                      | 3                | ✓                 |           |
| BHWA1_01055                      | 4                | ✓                 |           |
| BHWA1_01056                      | 2                |                   |           |
| BHWA1_01058                      | 4                | ✓                 |           |
| BHWA1_01059                      | 4                | ✓                 |           |
| BHWA1_01096                      | 7                |                   |           |
| BHWA1_01125                      | 6                | ✓                 |           |
| BHWA1_01126                      | 7                | ✓                 |           |
| BHWA1_01127                      | 7                | ✓                 |           |
| BHWA1_01128                      | 2                |                   |           |
| BHWA1_01195                      | 3                |                   | ✓ (3)     |
| BHWA1_01259                      | 3                |                   | ✓ (1)     |
| BHWA1_01425                      | 4                | ✓                 |           |
| BHWA1_01790                      | 5                |                   |           |
| BHWA1_01877                      | 4                |                   |           |
| BHWA1_01878                      | 8                | ✓                 |           |
| BHWA1_01895                      | 9                | ✓                 |           |
| BHWA1_02033                      | 8                | ✓                 |           |
| BHWA1_02034                      | 8                | ✓                 |           |
| BHWA1_02035                      | 7                | ✓                 |           |
| BHWA1_02162                      | 15               |                   |           |
| BHWA1_02195                      | 4                | ✓                 |           |
| BHWA1_02196                      | 3                | ✓                 |           |
| BHWA1_02197                      | 3                | ✓                 |           |
| BHWA1_02198                      | 4                | ✓                 |           |
| BHWA1_02271                      | 6                |                   |           |
| BHWA1_02343                      | 2                |                   |           |
| BHWA1_02414                      | 7                |                   |           |
| BHWA1_02441                      | 3                |                   |           |
| BHWA1_02448                      | 4                |                   |           |
| BHWA1_02450                      | 7                |                   |           |
