# Supplementary material for: Ankyrin domains across the Tree of Life
Source: PubMed Central journal article supplement (PMC3932732; doi:10.7717/peerj.264), 2014-02-06
Supplement: peerj-02-264-s012.pdf [file peerj-02-264-s012.pdf]

| <b>Genome</b>                                               | <b>Ankryin proteins</b> |
|-------------------------------------------------------------|-------------------------|
| Campylobacter concisus 13826                                | 2                       |
| Campylobacter curvus 525.92                                 | 2                       |
| Campylobacter fetus subsp. fetus 82-40                      | 2                       |
| Campylobacter hominis ATCC BAA-381                          | 3                       |
| Campylobacter jejuni RM1221                                 | 2                       |
| Campylobacter jejuni subsp. doylei 269.97                   | 2                       |
| Campylobacter jejuni subsp. jejuni 81-176                   | 2                       |
| Campylobacter jejuni subsp. jejuni 81116                    | 2                       |
| Campylobacter jejuni subsp. jejuni IA3902                   | 3                       |
| Campylobacter jejuni subsp. jejuni ICDCJ07001               | 2                       |
| Campylobacter jejuni subsp. jejuni M1                       | 2                       |
| Campylobacter jejuni subsp. jejuni NCTC 11168 = ATCC 700819 | 3                       |
| Campylobacter jejuni subsp. jejuni S3                       | 3                       |
| Campylobacter lari RM2100                                   | 2                       |
| Helicobacter acinonychis str. Sheeba                        | 0                       |
| Helicobacter bizzozeronii CIII-1                            | 0                       |
| Helicobacter cetorum MIT 00-7128                            | 0                       |
| Helicobacter cetorum MIT 99-5656                            | 0                       |
| Helicobacter cinaedi PAGU611                                | 3                       |
| Helicobacter felis ATCC 49179                               | 0                       |
| Helicobacter hepaticus ATCC 51449                           | 13                      |
| Helicobacter mustelae 12198                                 | 2                       |
| Helicobacter pylori 2017                                    | 0                       |
| Helicobacter pylori 2018                                    | 0                       |
| Helicobacter pylori 26695                                   | 0                       |
| Helicobacter pylori 35A                                     | 0                       |
| Helicobacter pylori 51                                      | 0                       |
| Helicobacter pylori 52                                      | 0                       |
| Helicobacter pylori 83                                      | 0                       |
| Helicobacter pylori 908                                     | 0                       |
| Helicobacter pylori B38                                     | 0                       |
| Helicobacter pylori B8                                      | 0                       |
| Helicobacter pylori Cuz20                                   | 0                       |
| Helicobacter pylori ELS37                                   | 0                       |
| Helicobacter pylori F16                                     | 0                       |
| Helicobacter pylori F30                                     | 0                       |
| Helicobacter pylori F32                                     | 0                       |
| Helicobacter pylori F57                                     | 0                       |
| Helicobacter pylori G27                                     | 0                       |
| Helicobacter pylori Gambia94/24                             | 0                       |
| Helicobacter pylori HPAG1                                   | 0                       |
| Helicobacter pylori HUP-B14                                 | 0                       |
| Helicobacter pylori India7                                  | 0                       |
| Helicobacter pylori J99                                     | 0                       |
| Helicobacter pylori Lithuania75                             | 0                       |
| Helicobacter pylori P12                                     | 0                       |
| Helicobacter pylori PeCan18                                 | 0                       |
| Helicobacter pylori PeCan4                                  | 0                       |
| Helicobacter pylori Puno120                                 | 0                       |
| Helicobacter pylori Puno135                                 | 0                       |
| Helicobacter pylori Sat464                                  | 0                       |
| Helicobacter pylori Shi112                                  | 0                       |
| Helicobacter pylori Shi169                                  | 0                       |
| Helicobacter pylori Shi417                                  | 0                       |
| Helicobacter pylori Shi470                                  | 0                       |
| Helicobacter pylori SJM180                                  | 0                       |
| Helicobacter pylori SNT49                                   | 0                       |
| Helicobacter pylori SouthAfrica7                            | 0                       |
| Helicobacter pylori v225d                                   | 0                       |
| Helicobacter pylori XZ274                                   | 0                       |
