# Supplementary material for: Ankyrin domains across the Tree of Life
Source: PubMed Central journal article supplement (PMC3932732; doi:10.7717/peerj.264), 2014-02-06
Supplement: peerj-02-264-s014.pdf [file peerj-02-264-s014.pdf]

| <i>H. hepaticus</i><br>gene | # ANK<br>repeats | Signal<br>Peptide | TM domain |
|-----------------------------|------------------|-------------------|-----------|
| HH0042                      | 4                |                   |           |
| HH0050                      | 4                |                   |           |
| HH0051                      | 3                |                   |           |
| HH0125                      | 2                |                   | ✓ (1)     |
| HH0126                      | 3                |                   | ✓ (1)     |
| HH0213                      | 3                |                   |           |
| HH0559                      | 4                | ✓                 |           |
| HH0814                      | 3                |                   |           |
| HH0925                      | 4                |                   |           |
| HH1187                      | 7                | ✓                 |           |
| HH1271                      | 2                | ✓                 |           |
| HH1376                      | 3                |                   |           |
| HH1405                      | 3                |                   |           |
