# Supplementary material for: Ankyrin domains across the Tree of Life
Source: PubMed Central journal article supplement (PMC3932732; doi:10.7717/peerj.264), 2014-02-06
Supplement: peerj-02-264-s015.pdf [file peerj-02-264-s015.pdf]

| <i>D. tiedjei</i><br>gene | #Ank<br>repeats | Signal<br>peptide | TM<br>domain | Other<br>domain |
|---------------------------|-----------------|-------------------|--------------|-----------------|
| Desti_0108                | 7               |                   |              |                 |
| Desti_0109                | 14              |                   |              |                 |
| Desti_0110                | 6               |                   |              |                 |
| Desti_0123                | 6               | ✓                 |              |                 |
| Desti_0423                | 2               |                   |              |                 |
| Desti_0449                | 4               |                   |              | ✓ *             |
| Desti_0581                | 2               |                   | ✓ (1)        |                 |
| Desti_0621                | 7               | ✓                 |              |                 |
| Desti_0634                | 13              | ✓                 |              |                 |
| Desti_1029                | 19              | ✓                 |              |                 |
| Desti_1504                | 12              | ✓                 |              | ✓ **            |
| Desti_1904                | 11              | ✓                 |              |                 |
| Desti_2412                | 9               | ✓                 | ✓ (4)        |                 |
| Desti_2485                | 5               | ✓                 |              |                 |
| Desti_2943                | 13              | ✓                 |              |                 |
| Desti_3186                | 10              |                   |              |                 |
| Desti_3335                | 15              |                   |              |                 |
| Desti_3392                | 3               |                   |              |                 |
| Desti_3481                | 10              | ✓                 |              |                 |
| Desti_3485                | 14              | ✓                 |              |                 |
| Desti_3962                | 5               | ✓                 |              |                 |
| Desti_3965                | 5               |                   |              |                 |
| Desti_4073                | 10              |                   |              |                 |
| Desti_4168                | 5               |                   |              |                 |
| Desti_4205                | 5               |                   |              |                 |
| Desti_4229                | 7               | ✓                 |              |                 |
| Desti_4389                | 3               |                   |              |                 |
| Desti_4485                | 4               | ✓                 |              |                 |
| Desti_4583                | 23              |                   |              |                 |
| Desti_4612                | 10              |                   |              |                 |
| Desti_4613                | 6               |                   |              |                 |
| Desti_4766                | 4               | ✓                 |              |                 |
| Desti_4853                | 9               |                   |              |                 |
| Desti_4969                | 8               | ✓                 |              |                 |
| Desti_5044                | 21              |                   |              |                 |
| Desti_5063                | 5               |                   |              |                 |
| Desti_5169                | 8               |                   |              |                 |
| Desti_5172                | 11              | ✓                 |              |                 |
| Desti_5175                | 7               | ✓                 |              |                 |
| Desti_5480                | 7               |                   |              |                 |
| Desti_5576                | 3               |                   |              |                 |
| Desti_5617                | 6               | ✓                 |              |                 |
