# Supplementary material for: Ankyrin domains across the Tree of Life
Source: PeerJ. 2014 Feb 6;2:e264. doi: 10.7717/peerj.264 (PMC3932732; doi:10.7717/peerj.264)
Supplement: Supplemental Information 1 [file peerj-02-264-s001.xls]

## Sheet: Sheet1
Domain	Species	Number ANK proteins	Total Protein Number (NCBI genome)	% Proteins with Ank
Eukarya	Acremonium alcalophilumv 1.0	436
Eukarya	Acromyrmex echinatior v3.8 (Panamanian leafcutter ant)	87	14049	0.619261
Eukarya	Acropora digitifera v1.0	318
Eukarya	Acyrthosiphon pisum (Pea aphid)	105
Eukarya	Aedes aegypti 55 (Yellow fever mosquito)	117	16785	0.697051
Eukarya	Agaricus bisporus var. bisporus	21	11278	0.186203
Eukarya	Ailuropoda melanoleuca 69_1 (Giant panda)	230	17538	1.31144
Eukarya	Ajellomyces dermatitidis ER-3	57	9539	0.597547
Eukarya	Ajellomyces dermatitidis SLH14081	58	9587	0.604986
Eukarya	Allomyces macrogynus ATCC 38327	72
Eukarya	Alternaria brassicicola	43
Eukarya	Amanita muscaria Koide v1.0 (Fly agaric)	49
Eukarya	Amanita thiersii Skay4041 v1.0	25
Eukarya	Amorphotheca resinae v1.0 (Kerosene fungus)	37
Eukarya	Amphimedon queenslandica	1033	9827	10.5119
Eukarya	Anolis carolinensis 69_2.0 (Green anole)	209	16546	1.26315
Eukarya	Anopheles gambiae 49_3j (African malaria mosquito)	101	14099	0.716363
Eukarya	Anopheles gambiae VectorBase AgamP3.6 (African malaria mosquito)	112	14099	0.794383
Eukarya	Apiospora montagnei NRRL 25634 v1.0	146
Eukarya	Apis mellifera 38.2d (Bee)	186	10575	1.75887
Eukarya	Aquilegia coerulea v195	229
Eukarya	Arabidopsis lyrata (Lyrate rockcress)	76	32549	0.233494
Eukarya	Arabidopsis thaliana 10 (Mouse-ear cress)	158	35378	0.446605
Eukarya	Arthroderma benhamiae CBS 112371	50	7980	0.626566
Eukarya	Ascaris suum Victoria/Ghent (Pig roundworm)	96
Eukarya	Ashbya gossypii ATCC 10895	17	4776	0.355946
Eukarya	Aspergillus acidus v1.0	80
Eukarya	Aspergillus brasiliensis v1.0	86
Eukarya	Aspergillus carbonarius ITEM 5010	75
Eukarya	Aspergillus clavatus NRRL 1	50	9121	0.548186
Eukarya	Aspergillus flavus NRRL3357	109	13485	0.808306
Eukarya	Aspergillus fumigatus A1163	73	9948	0.733816
Eukarya	Aspergillus fumigatus Af293	68
Eukarya	Aspergillus glaucus v1.0	130
Eukarya	Aspergillus nidulans FGSC A4	63	10534	0.598063
Eukarya	Aspergillus niger ATCC 1015	74	10950	0.675799
Eukarya	Aspergillus oryzae RIB40	117	24880	0.470257
Eukarya	Aspergillus sydowii v1.0	130
Eukarya	Aspergillus terreus NIH2624	98	10401	0.942217
Eukarya	Aspergillus tubingensis v1.0	81
Eukarya	Aspergillus versicolor v1.0	93
Eukarya	Aspergillus wentii v1.0	121
Eukarya	Aspergillus zonatus v1.0	51
Eukarya	Asterochloris sp. Cgr/DA1pho v1.0	44
Eukarya	Atta cephalotes v1.1	112
Eukarya	Aureobasidium pullulans var. subglaciale EXF-2481 v1.0	29
Eukarya	Aureococcus anophagefferens	193	11520	1.67535
Eukarya	Babesia bovis T2Bo	20	3706	0.539665
Eukarya	Babjeviella inositovora NRRL Y-12698 v1.0	15
Eukarya	Bathycoccus	182
Eukarya	Batrachochytrium dendrobatidis JAM81	33	8700	0.37931
Eukarya	Batrachochytrium dendrobatidis JEL423	44
Eukarya	Bombyx mori (Silk moth)	106
Eukarya	Bos taurus 69_3.1 (Bovine)	252	22070	1.14182
Eukarya	Botrytis cinerea B05.10	72	16389	0.439319
Eukarya	Brachypodium distachyon	142	24689	0.575155
Eukarya	Branchiostoma floridae 1.0 (Florida lancelet)	409	28623	1.42892
Eukarya	Brassica rapa Chiifu-401 1.2 (Field mustard)	160
Eukarya	Brugia malayi WS218 (Agent of lymphatic filariasis)	114	11472	0.993724
Eukarya	Caenorhabditis brenneri	136	30670	0.44343
Eukarya	Caenorhabditis briggsae 2	88	19404	0.453515
Eukarya	Caenorhabditis elegans 69_215 (Nematode)	183	23906	0.765498
Eukarya	Caenorhabditis elegans WormBase WS218 (Nematode)	141	23906	0.58981
Eukarya	Caenorhabditis japonica	87
Eukarya	Caenorhabditis remanei	126	31476	0.400305
Eukarya	Callithrix jacchus 69_3.2.1 (Common marmoset)	539	22982	2.34531
Eukarya	Camponotus floridanus v3.3 (Florida carpenter ant)	110	14864	0.740043
Eukarya	Candida albicans SC5314	18	5752	0.312935
Eukarya	Candida albicans WO-1	18	5752	0.312935
Eukarya	Candida dubliniensis CD36	18	5860	0.307167
Eukarya	Candida glabrata CBS138	18	5213	0.345291
Eukarya	Candida guilliermondii ATCC 6260	19	5920	0.320946
Eukarya	Candida lusitaniae ATCC 42720	19	5936	0.320081
Eukarya	Candida parapsilosis	19
Eukarya	Candida tanzawaensis NRRL Y-17324 v1.0	16
Eukarya	Candida tropicalis MYA-3404	17	6254	0.271826
Eukarya	Canis familiaris 69_3.1 (Dogs)	305	22144	1.37735
Eukarya	Capitella sp. I	456
Eukarya	Capsaspora owczarzaki ATCC 30864	126	8381	1.5034
Eukarya	Capsella rubella v183	135
Eukarya	Carica papaya (Mamon)	89
Eukarya	Catenaria anguillulae PL171 v1.0	119
Eukarya	Cavia porcellus 69_3 (Guinea pig)	228
Eukarya	Chaetomium globosum CBS 148.51	107	11048	0.968501
Eukarya	Chlamydomonas reinhardtii 4.0	160
Eukarya	Chlorella sp. NC64A	121	9780	1.23722
Eukarya	Chlorella vulgaris	47
Eukarya	Choloepus hoffmanni 69_1 (Hoffmann's two-toed sloth)	125
Eukarya	Ciona intestinalis 69 (Sea vase)	123
Eukarya	Ciona savignyi 69_2.0 (Transparent tunicate)	170
Eukarya	Citrus clementina v165	283
Eukarya	Citrus sinensis v154 (Apfelsine)	321
Eukarya	Coccidioides immitis H538.4	48
Eukarya	Coccidioides immitis RMSCC 2394	47
Eukarya	Coccidioides immitis RMSCC 3703	46
Eukarya	Coccidioides immitis RS	49	10440	0.469349
Eukarya	Coccidioides posadasii RMSCC 3488	47	7229	0.650159
Eukarya	Coccidioides posadasii str. Silveira	48	10228	0.4693
Eukarya	Coccomyxa sp. C-169	38	9839	0.386218
Eukarya	Cochliobolus carbonum 26-R-13 v1.0	84
Eukarya	Cochliobolus heterostrophus	55	13316	0.413037
Eukarya	Cochliobolus lunatus m118 v2.0	91
Eukarya	Cochliobolus miyabeanus ATCC 44560 v1.0	80
Eukarya	Cochliobolus victoriae FI3 v1.0	88
Eukarya	Conidiobolus coronatus NRRL28638 v1.0	28
Eukarya	Coniophora puteana	25	13758	0.181712
Eukarya	Coprinopsis cinerea okayama7 130 v3	97	13356	0.726265
Eukarya	Cronartium quercuum f. sp. fusiforme G11 v1.0	16
Eukarya	Cryphonectria parasitica (Chestnut blight fungus)	61
Eukarya	Cryptococcus neoformans B-3501A	18	6578	0.273639
Eukarya	Cryptococcus neoformans JEC21	15	6475	0.23166
Eukarya	Cryptococcus neoformans var. grubii H99	18	6993	0.2574
Eukarya	Cryptosporidium hominis	19	3885	0.48906
Eukarya	Cryptosporidium muris	21	3934	0.533808
Eukarya	Cryptosporidium parvum Iowa II	21	3805	0.551905
Eukarya	Cucumis sativus v122 (Cucumbers)	151
Eukarya	Culex pipiens quinquefasciatus (Southern house mosquito)	136	18883	0.720225
Eukarya	Cyanidioschyzon merolae	11	4803	0.229024
Eukarya	Daldinia eschscholzii EC12 v1.0	82
Eukarya	Danaus plexippus OGS1.0 (American monarch)	108	16254	0.664452
Eukarya	Danio rerio 69_9 (Leopard danio)	447	27404	1.63115
Eukarya	Daphnia pulex (Common water flea)	338	30611	1.10418
Eukarya	Dasypus novemcinctus 69_2 (Nine-banded armadillo)	153
Eukarya	Debaromyces hansenii	20	6290	0.317965
Eukarya	Dekkera bruxellensis CBS 2499 v2.0	17	4861	0.349722
Eukarya	Dichomitus squalens	19	12287	0.154635
Eukarya	Dictyostelium discoideum	99	13315	0.743522
Eukarya	Dictyostelium purpureum	83	12399	0.669409
Eukarya	Didymella exigua CBS 183.55 v1.0	66
Eukarya	Dipodomys ordii 69_1 (Ord's kangaroo rat)	187
Eukarya	Dothistroma septosporum	40
Eukarya	Drosophila ananassae 1.3	86	15070	0.57067
Eukarya	Drosophila erecta 1.3	83	15048	0.551568
Eukarya	Drosophila grimshawi 1.3	92	14986	0.613906
Eukarya	Drosophila melanogaster 69_5 (Fruit fly)	211	24113	0.875047
Eukarya	Drosophila melanogaster FlyBase 5.12 (Fruit fly)	200	24113	0.829428
Eukarya	Drosophila mojavensis 1.3	82	14595	0.561836
Eukarya	Drosophila persimilis 1.3	85	16878	0.503614
Eukarya	Drosophila pseudoobscura 2.13	84	16581	0.506604
Eukarya	Drosophila sechellia 1.3	82	16484	0.497452
Eukarya	Drosophila simulans 1.3	73	15428	0.473166
Eukarya	Drosophila virilis 1.2	85	14491	0.586571
Eukarya	Drosophila willistoni 1.3	86	15513	0.554374
Eukarya	Drosophila yakuba 1.3	83	16095	0.515688
Eukarya	Echinococcus granulosus	92
Eukarya	Echinococcus multilocularis	93
Eukarya	Echinops telfairi 69 (Lesser hedgehog tenrec)	179
Eukarya	Ectocarpus siliculosus	463
Eukarya	Emiliania huxleyi CCMP1516	481
Eukarya	Entamoeba dispar 1.2	44	8811	0.499376
Eukarya	Entamoeba histolytica 1	45	8163	0.386218
Eukarya	Entamoeba invadens 1.2	50
Eukarya	Equus caballus 69_2 (Domestic horse)	254	20646	1.23026
Eukarya	Erinaceus europaeus 69 (Western European hedgehog)	158
Eukarya	Eucalyptus grandis v201 (Rose gum)	390
Eukarya	Felis catus 69 (Cat)	166	21734	0.76378
Eukarya	Fomitiporia mediterranea v1.0	20	11338	0.176398
Eukarya	Fomitopsis pinicola FP-58527 SS1 v3.0	32
Eukarya	Fomitopsis pinicolav1.0	32
Eukarya	Fragaria vesca (Alpine strawberry)	149
Eukarya	Fragilariopsis cylindrus	187
Eukarya	Fusarium graminearum	108	11628	0.928793
Eukarya	Fusarium oxysporum f. sp. lycopersici 4286	152
Eukarya	Fusarium verticillioides 7600	115
Eukarya	Gadus morhua 69_1 (Atlantic cod)	256
Eukarya	Galerina marginata v1.0	81
Eukarya	Gallus gallus 69_2 (Bantam)	241	16868	1.42874
Eukarya	Gasterosteus aculeatus 69_1 (Three spined stickleback)	288
Eukarya	Giardia lamblia 2.3	464	6502	7.13627
Eukarya	Gloeophyllum trabeumv1.0	32
Eukarya	Glycine max v109 (Soybeans)	277	44642	0.620492
Eukarya	Gorilla gorilla 69_3.1 (Gorilla)	332	33606	0.987919
Eukarya	Gossypium raimondii v221	448
Eukarya	Hanseniaspora valbyensis NRRL Y-1626 v1.1	14
Eukarya	Hansenula polymorpha v2.0	14
Eukarya	Harpegnathos saltator v3.3 (Jerdon's jumping ant)	91	15127	0.601573
Eukarya	Hebeloma cylindrosporum h7 v2.0	37
Eukarya	Heliconius melpomene	27
Eukarya	Heliconius numata	18
Eukarya	Helobdella robusta	169
Eukarya	Heterobasidion annosum	43
Eukarya	Heterocephalus glaber v1.7-2 (Naked mole rat)	231	21771	1.06104
Eukarya	Histoplasma capsulatum class NAmI strain WU24	48	9313	0.515409
Eukarya	Histoplasma capsulatum G186AR	49	9254	0.529501
Eukarya	Histoplasma capsulatum H143	43	9547	0.450403
Eukarya	Histoplasma capsulatum H88	48	9445	0.508205
Eukarya	Homo sapiens 69_37 (Man)	1051	33711	3.11768
Eukarya	Hydnomerulius pinastri v2.0	42
Eukarya	Hydra magnipapillata	160
Eukarya	Hymenolepis microstoma	118
Eukarya	Hyphopichia burtonii NRRL Y-1933 v1.0	18
Eukarya	Ichthyophthirius multifiliis strain G5	49	8056	0.608242
Eukarya	Ictidomys tridecemlineatus 69_2 (Thirteen-lined ground squirrel)	209
Eukarya	Ixodes scapularis (Blacklegged tick)	100	5867	1.70445
Eukarya	Kluyveromyces lactis	18	5085	0.353982
Eukarya	Kluyveromyces thermotolerans CBS 6340	18	5091	0.353565
Eukarya	Kluyveromyces waltii	17
Eukarya	Laccaria bicolor S238N-H82	79
Eukarya	Lachancea kluyveri	17
Eukarya	Latimeria chalumnae 69_1 (Coelacanth)	274
Eukarya	Leishmania braziliensis MHOM/BR/75/M2904 2.4	29	7644	0.379383
Eukarya	Leishmania infantum JPCM5 2.4	31	7992	0.387888
Eukarya	Leishmania major strain Friedlin	33	8265	0.399274
Eukarya	Leishmania mexicana 2.4	33	8147	0.405057
Eukarya	Linepithema humile v1.1 (Argentine ant)	101
Eukarya	Linum usitatissimum v200 (Flax)	179
Eukarya	Lodderomyces elongisporus NRRL YB-4239	17	5799	0.293154
Eukarya	Lottia gigantea	207
Eukarya	Loxodonta africana 69_3 (African bush elephant)	295
Eukarya	Macaca mulatta 69_1 (Rhesus macaque)	397	29757	1.33414
Eukarya	Macropus eugenii 69_1.0 (Tammar wallaby)	187
Eukarya	Magnaporthe grisea 70-15	68	12713	0.534886
Eukarya	Malassezia globosa CBS 7966	28	5020	0.557769
Eukarya	Malus domestica v196 (Apple)	335
Eukarya	Manihot esculenta v147 (Manioc)	196
Eukarya	Medicago truncatula (Barrel medic)	127	46092	0.275536
Eukarya	Melampsora laricis-populina	17	16372	0.103836
Eukarya	Meleagris gallopavo 69_2 (Common turkey)	192	12504	1.53551
Eukarya	Meloidogyne hapla	45
Eukarya	Meloidogyne incognita (Southern root-knot nematode)	71
Eukarya	Metschnikowia bicuspidata NRRL YB-4993 v1.0	16
Eukarya	Microcebus murinus 69_1 (Grey mouse lemur)	181
Eukarya	Micromonas pusilla CCMP1545 v3.0	1598	10296	15.5206
Eukarya	Micromonas sp. RCC299	94	10140	0.927022
Eukarya	Microsporum canis CBS 113480	64	8765	0.730177
Eukarya	Microsporum gypseum	71
Eukarya	Mimulus guttatus v140 (Common monkey flower)	141
Eukarya	Mixia osmundae IAM 14324 v1.0	17
Eukarya	Monodelphis domestica 69_5 (Gray short-tailed opossum)	221	19083	1.1581
Eukarya	Monosiga brevicollis	203	9203	2.2058
Eukarya	Mortierella verticillata NRRL 6337	68
Eukarya	Mucor circinelloides	37
Eukarya	Mus musculus 69_38 (Mouse)	505	28884	1.74837
Eukarya	Mustela putorius furo 69_1.0 (Black ferret)	217
Eukarya	Mycosphaerella fijiensis CIRAD86	33
Eukarya	Mycosphaerella graminicola IPO323	49	10963	0.446958
Eukarya	Myotis lucifugus 69_2.0 (Little brown bat)	210
Eukarya	Naegleria gruberi	162	15711	1.03112
Eukarya	Nasonia vitripennis (Jewel wasp)	108	12988	0.831537
Eukarya	Nectria haematococca mpVI	140	15708	0.891266
Eukarya	Nematostella vectensis 1.0 (Starlet sea anemone)	202	24780	0.815174
Eukarya	Neosartorya fischeri NRRL 181	96	10395	0.923521
Eukarya	Neospora caninum	27	6936	0.389273
Eukarya	Neospora caninum Nc-Liverpool 6.2	27	6936	0.389273
Eukarya	Neurospora crassa OR74A	55	9841	0.558886
Eukarya	Neurospora discreta FGSC 8579	45
Eukarya	Neurospora tetrasperma	50	10380	0.481696
Eukarya	Nomascus leucogenys 69_1.0 (White-cheeked Gibbon)	276	29574	0.933252
Eukarya	Ochotona princeps 69 (Southern American pika)	184
Eukarya	Oikopleura dioica	125
Eukarya	Oreochromis niloticus 69_1.0 (Nile tilapia)	327	23162	1.4118
Eukarya	Ornithorhynchus anatinus 69_5 (Duck-billed platypus)	217	17118	1.26767
Eukarya	Oryctolagus cuniculus 69_2 (Domestic rabbit)	263	17554	1.49823
Eukarya	Oryza glaberrima (African rice)	152
Eukarya	Oryza sativa ssp. Indica	209	37358	0.559452
Eukarya	Oryza sativa ssp. japonica 5.0 (Japanese rice)	275	35394	0.776968
Eukarya	Oryza sativa v193 (Red rice)	267	35394	0.754365
Eukarya	Oryzias latipes 69_1 (Japanese rice fish)	272	19045	1.4282
Eukarya	Ostreococcus lucimarinus CCE9901	68	7603	0.894384
Eukarya	Ostreococcus sp. RCC809	49
Eukarya	Ostreococcus tauri	64	7990	0.801001
Eukarya	Otolemur garnettii 69_3 (Small-eared galago)	227
Eukarya	Pan troglodytes 69_2.1.4 (Chimpanzee)	231	33845	0.682523
Eukarya	Panicum virgatum v202 (Switchgrass)	268
Eukarya	Paracoccidioides brasiliensis Pb01	48	9136	0.525394
Eukarya	Paracoccidioides brasiliensis Pb03	40
Eukarya	Paracoccidioides brasiliensis Pb18	43	8741	0.491935
Eukarya	Paramecium tetraurelia	267	39580	0.674583
Eukarya	Paxillus rubicundulus Ve08.2h10 v1.0	54
Eukarya	Pediculus humanus corporis (Human body lice)	101	10775	0.937355
Eukarya	Pelodiscus sinensis 69_1.0 (Chinese softshell turtle)	225
Eukarya	Penicillium chrysogenum v1.0	68	25582	0.265812
Eukarya	Penicillium chrysogenum Wisconsin 54-1255	121	25582	0.472989
Eukarya	Penicillium marneffei ATCC 18224	100	10664	0.937734
Eukarya	Perkinsus marinus ATCC 50983	146	23654	0.617232
Eukarya	Petromyzon marinus 69_7.0 (Marine lamprey)	112
Eukarya	Phaeodactylum tricornutumCCAP 1055/1	89	10408	0.855111
Eukarya	Phanerochaete chrysosporium RP-78 2.1	21
Eukarya	Phaseolus vulgaris v186 (French bean)	181
Eukarya	Phycomyces blakesleeanus	43
Eukarya	Physcomitrella patens subsp. patens	69	35936	0.192008
Eukarya	Phytophthora capsici	187
Eukarya	Phytophthora infestans T30-4	244	17797	1.37102
Eukarya	Phytophthora ramorum 1.1 (Sudden oak death agent)	207
Eukarya	Phytophthora sojae 1.1	342	26489	1.2911
Eukarya	Pichia membranifaciensv1.0	15
Eukarya	Pichia pastoris GS115	15	5040	0.297619
Eukarya	Pichia stipitis CBS 6054	16	5816	0.275103
Eukarya	Piloderma croceum F 1598 v1.0	77
Eukarya	Pisolithus microcarpus 441 v1.0	25
Eukarya	Pisolithus tinctorius Marx 270 v1.0	33
Eukarya	Plasmodium berghei ANKA	16	9821	0.162916
Eukarya	Plasmodium chabaudi	16	12252	0.130591
Eukarya	Plasmodium falciparum 3D7	16	5337	0.299794
Eukarya	Plasmodium falciparum Dd2	10
Eukarya	Plasmodium falciparum HB3	14
Eukarya	Plasmodium knowlesi strain H	16	5102	0.313603
Eukarya	Plasmodium vivax SaI-1 7.0	16	5392	0.296736
Eukarya	Plasmodium yoelii ssp. yoelii 1	14	7353	0.190398
Eukarya	Pleurotus ostreatus (Oyster mushroom)	25
Eukarya	Podospora anserina	93
Eukarya	Pogonomyrmex barbatus v1.2 (Red harvester ant)	100
Eukarya	Pongo abelii 69_2 (Orang utan)	236	28670	0.82316
Eukarya	Populus trichocarpa v156 (Black cottonwood)	249	40521	0.614496
Eukarya	Postia placenta	45	9083	0.495431
Eukarya	Pristionchus pacificus	102
Eukarya	Procavia capensis 69_1 (Cape hyrax)	197
Eukarya	Proterospongia sp. ATCC 50818	209	11731	1.7816
Eukarya	Prunus persica v139 (Peach)	180
Eukarya	Pteropus vampyrus 69_1 (Large flying fox)	202
Eukarya	Puccinia graminis f. sp. tritici CRL 75-36-700-3	16	20567	0.0777945
Eukarya	Punctularia strigosozonata v1.0	22	11540	0.190641
Eukarya	Pyrenophora tritici-repentis	68	12169	0.558797
Eukarya	Pythium ultimum v1.7-2	277
Eukarya	Rattus norvegicus 69_3.4 (Brown rat)	393	22087	1.77933
Eukarya	Rhizopus oryzae RA 99-880	65	17459	0.372301
Eukarya	Rhodotorula graminis WP1 v1.0	18
Eukarya	Saccharomyces bayanus MIT	19
Eukarya	Saccharomyces cerevisiae 69_4 (Brewer's yeast)	20	5907	0.338581
Eukarya	Saccharomyces cerevisiae AWRI1631	10	5451	0.183453
Eukarya	Saccharomyces cerevisiae AWRI796	18	3786	0.475436
Eukarya	Saccharomyces cerevisiae CBS7960	16
Eukarya	Saccharomyces cerevisiae CLIB215	13
Eukarya	Saccharomyces cerevisiae CLIB324	8
Eukarya	Saccharomyces cerevisiae CLIB382	0
Eukarya	Saccharomyces cerevisiae FL100	11
Eukarya	Saccharomyces cerevisiae FostersB	16	3689	0.433722
Eukarya	Saccharomyces cerevisiae FostersO	16	3575	0.447552
Eukarya	Saccharomyces cerevisiae JAY291	19	5197	0.365596
Eukarya	Saccharomyces cerevisiae LalvinQA23	17	4022	0.422675
Eukarya	Saccharomyces cerevisiae M22	7
Eukarya	Saccharomyces cerevisiae PW5	16
Eukarya	Saccharomyces cerevisiae RM11-1a	19	5377	0.353357
Eukarya	Saccharomyces cerevisiae RM11-1a	19	5377	0.353357
Eukarya	Saccharomyces cerevisiae SGD (Brewer's yeast)	20
Eukarya	Saccharomyces cerevisiae Sigma1278b	19
Eukarya	Saccharomyces cerevisiae T7	19
Eukarya	Saccharomyces cerevisiae T73	7
Eukarya	Saccharomyces cerevisiae UC5	12
Eukarya	Saccharomyces cerevisiae Vin13	16	3930	0.407125
Eukarya	Saccharomyces cerevisiae VL3	15	4025	0.372671
Eukarya	Saccharomyces cerevisiae W303	20
Eukarya	Saccharomyces cerevisiae Y10	5
Eukarya	Saccharomyces cerevisiae YJM269	16
Eukarya	Saccharomyces cerevisiae YJM789	20	5912	0.338295
Eukarya	Saccharomyces cerevisiae YJM789	20	5912	0.338295
Eukarya	Saccharomyces cerevisiae YPS163	10
Eukarya	Saccharomyces mikatae MIT	19
Eukarya	Saccharomyces paradoxus MIT	19
Eukarya	Saccoglossus kowalevskii v3.0	422
Eukarya	Sarcophilus harrisii 69_7.0 (Tasmanian devil)	255
Eukarya	Schistosoma mansoni	106	21138	0.501467
Eukarya	Schizophyllum commune	30	13194	0.227376
Eukarya	Schizosaccharomyces japonicus yFS275	16	4814	0.332364
Eukarya	Schizosaccharomyces octosporus yFS286	15
Eukarya	Schizosaccharomyces pombe (Fission yeast)	15	5020	0.298805
Eukarya	Schizosaccharomyces pombe 972h-	15
Eukarya	Scleroderma citrinum Foug A v1.0	21
Eukarya	Sclerotinia sclerotiorum	54	14446	0.373806
Eukarya	Sebacina vermifera MAFF 305830 v1.0	34
Eukarya	Selaginella moellendorffii	114	34747	0.328086
Eukarya	Septoria musiva v1.0	34
Eukarya	Serpula lacrymans var. lacrymans S7.9	34	12925	0.263056
Eukarya	Setaria italica v164 (Foxtail millet)	165
Eukarya	Setosphaeria turcica v1.0	59
Eukarya	Solanum lycopersicum v.2.3 (Tomato)	125
Eukarya	Solanum tuberosum (Potatoes)	188
Eukarya	Solenopsis invicta v.2.2.3 (Imported red fire ant)	86	14180	0.606488
Eukarya	Sorex araneus 69_1 (Eurasian shrew)	141
Eukarya	Sorghum bicolor (Broomcorn)	151	33005	0.457506
Eukarya	Sphaerobolus stellatus v1.0	87
Eukarya	Sphaeroforma arctica JP610	154
Eukarya	Spizellomyces punctatus DAOM BR117	54
Eukarya	Sporobolomyces roseus IAM 13481	13
Eukarya	Sporotrichum thermophile ATCC 42464	33	9099	0.362677
Eukarya	Stagonospora nodorum	103	16002	0.64367
Eukarya	Stereum hirsutum FP-91666 SS1 v1.0	41	14066	0.291483
Eukarya	Strongylocentrotus purpuratus v3.1 (Purple sea urchin)	658
Eukarya	Sus scrofa 69_10.2 (Pigs)	258	22344	1.15467
Eukarya	Taenia solium	98
Eukarya	Taeniopygia guttata 69_3.2.4 (Zebra finch)	195	13310	1.46506
Eukarya	Takifugu rubripes 69_4 (Tiger puffer)	661	19459	3.39689
Eukarya	Tarsius syrichta 69_1 (Philippine tarsier)	148
Eukarya	Tetrahymena thermophila SB210 1	111	24770	0.448123
Eukarya	Tetranychus urticae (Red spider mite)	71
Eukarya	Tetraodon nigroviridis 69_8 (Spotted green pufferfish)	321	27918	1.1498
Eukarya	Thalassiosira pseudonana CCMP1335	94	11673	0.805277
Eukarya	Thecamonas trahens ATCC 50062	259
Eukarya	Theileria annulata	11	3798	0.289626
Eukarya	Theileria parva	10	4061	0.246245
Eukarya	Thellungiella halophila v173	140
Eukarya	Theobroma cacao B97-61/B2 v1 (Chocolate)	210
Eukarya	Theobroma cacao Matina 1-6 v0.9 (Chocolate)	209
Eukarya	Thielavia terrestris NRRL 8126	45	9802	0.45909
Eukarya	Toxoplasma gondii GT1	29	8102	0.357936
Eukarya	Toxoplasma gondii ME49	30	7987	0.37561
Eukarya	Toxoplasma gondii VEG	28	7845	0.356915
Eukarya	Trametes versicolor v1.0	28	14302	0.195777
Eukarya	Tremella mesenterica	16	8308	0.192585
Eukarya	Tribolium castaneum 3.0 (Rust-red flour beetle)	141	9833	1.43395
Eukarya	Trichoderma asperellum CBS 433.97 v1.0	125
Eukarya	Trichoderma atroviride	103
Eukarya	Trichoderma citrinoviride v1.0	64
Eukarya	Trichoderma harzianum CBS 226.95 v1.0	161
Eukarya	Trichoderma longibrachiatum ATCC 18648 v1.0	72
Eukarya	Trichoderma reesei 1.2	69
Eukarya	Trichoderma virens Gv29-8	107
Eukarya	Trichomonas vaginalis	3067	59679	5.13916
Eukarya	Trichophyton equinum CBS 127.97	53	8676	0.610881
Eukarya	Trichophyton rubrum CBS 118892	51	8706	0.585803
Eukarya	Trichophyton tonsurans CBS 112818	54	8521	0.633728
Eukarya	Trichophyton verrucosum HKI 0517	51	8028	0.635277
Eukarya	Trichoplax adhaerens	112	11520	0.972222
Eukarya	Trypanosoma brucei gambiense v4.1	30	9822	0.305437
Eukarya	Trypanosoma brucei Lister 427 v4.1	30
Eukarya	Trypanosoma brucei TREU927 v4.1	31	5825	0.532189
Eukarya	Trypanosoma congolense 2.4	33	5985	0.551378
Eukarya	Trypanosoma cruzi strain CL Brener	30	19607	0.153007
Eukarya	Trypanosoma vivax	26	3790	0.686016
Eukarya	Tuber melanosporum Vittad (Black truffle)	417	7496	5.56297
Eukarya	Tulasnella calospora AL13/4D v1.0	34
Eukarya	Tupaia belangeri 69 (Common tree shrew)	163
Eukarya	Tursiops truncatus 69_1 (Atlantic bottle-nosed dolphin)	200
Eukarya	Uncinocarpus reesii 1704	55	7760	0.708763
Eukarya	Ustilago maydis	18	6548	0.274893
Eukarya	Vanderwaltozyma polyspora DSM 70294	19	5376	0.353423
Eukarya	Verticillium albo-atrum VaMs.102	67	10237	0.654489
Eukarya	Verticillium dahliae VdLs.17	84	10535	0.797342
Eukarya	Vicugna pacos 69_1 (Alpaca)	138
Eukarya	Vitis vinifera (Wine grape)	199	21924	0.907681
Eukarya	Volvox carteri f. nagariensis	135	14436	0.935162
Eukarya	Volvox carteri v199	141	14436	0.976725
Eukarya	Wallemia sebi v1.0	15	5277	0.284252
Eukarya	Wickerhamomyces anomalus	16
Eukarya	Wolfiporia cocos MD-104 SS10 v1.0	32
Eukarya	Xenopus (Silurana) tropicalis v7.1 (annotation v7.2) (Western clawed frog)	344
Eukarya	Xenopus laevis (Clawed frog)	244
Eukarya	Xenopus tropicalis 69_4.2 (Western clawed frog)	250
Eukarya	Xiphophorus maculatus 69_4.4.2 (Southern platyfish)	248
Eukarya	Yarrowia lipolytica CLIB122	21	6472	0.324475
Eukarya	Zasmidium cellare ATCC 36951 v1.0	71
Eukarya	Zea mays subsp. mays (Corn)	158	63335	0.249467
Eukarya	Zea mays v181 (Maize)	187	63335	0.295255
Eukarya	Zygosaccharomyces rouxii	18	4991	0.360649
Bacteria	[Cellvibrio] gilvus ATCC 13127	0		0
Bacteria	Acaryochloris marina MBIC11017	12	8383	0.143147
Bacteria	Acetobacter pasteurianus IFO 3283-01	2	3049	0.0655953
Bacteria	Acetobacter pasteurianus IFO 3283-01-42C	2	2984	0.0670241
Bacteria	Acetobacter pasteurianus IFO 3283-03	2	3048	0.0656168
Bacteria	Acetobacter pasteurianus IFO 3283-07	2	3047	0.0656383
Bacteria	Acetobacter pasteurianus IFO 3283-12	2	3046	0.0656599
Bacteria	Acetobacter pasteurianus IFO 3283-22	2	3048	0.0656168
Bacteria	Acetobacter pasteurianus IFO 3283-26	2	3048	0.0656168
Bacteria	Acetobacter pasteurianus IFO 3283-32	2	3046	0.0656599
Bacteria	Acetobacterium woodii DSM 1030	0		0
Bacteria	Acetohalobium arabaticum DSM 5501	3	2282	0.131464
Bacteria	Acholeplasma laidlawii PG-8A	1	1380	0.0724638
Bacteria	Achromobacter xylosoxidans A8	3	6815	0.0440205
Bacteria	Acidaminococcus fermentans DSM 20731	0		0
Bacteria	Acidaminococcus intestini RyC-MR95	0		0
Bacteria	Acidimicrobium ferrooxidans DSM 10331	0		0
Bacteria	Acidiphilium cryptum JF-5	1	3559	0.0280978
Bacteria	Acidiphilium multivorum AIU301	1	3948	0.0253293
Bacteria	Acidithiobacillus caldus SM-1	0		0
Bacteria	Acidithiobacillus ferrivorans SS3	1	3093	0.0323311
Bacteria	Acidithiobacillus ferrooxidans ATCC 23270	1	3147	0.0317763
Bacteria	Acidithiobacillus ferrooxidans ATCC 53993	1	2826	0.0353857
Bacteria	Acidobacterium capsulatum ATCC 51196	1	3377	0.0296121
Bacteria	Acidothermus cellulolyticus 11B	0		0
Bacteria	Acidovorax avenae subsp. avenae ATCC 19860	3	4737	0.0633312
Bacteria	Acidovorax citrulli AAC00-1	2	4709	0.0424719
Bacteria	Acidovorax ebreus TPSY	3	3479	0.0862317
Bacteria	Acidovorax sp. JS42	3	4155	0.0722022
Bacteria	Acinetobacter baumannii 1656-2	4	3824	0.104603
Bacteria	Acinetobacter baumannii AB0057	3	3801	0.0789266
Bacteria	Acinetobacter baumannii AB307-0294	4	3451	0.115908
Bacteria	Acinetobacter baumannii ACICU	4	3759	0.106411
Bacteria	Acinetobacter baumannii ATCC 17978	4	3367	0.1188
Bacteria	Acinetobacter baumannii ATCC 19606	4	3766	0.106213
Bacteria	Acinetobacter baumannii AYE	3	3712	0.080819
Bacteria	Acinetobacter baumannii MDR-TJ	3	3936	0.0762195
Bacteria	Acinetobacter baumannii MDR-ZJ06	3	3888	0.0771605
Bacteria	Acinetobacter baumannii SDF	4	2975	0.134454
Bacteria	Acinetobacter baumannii TCDC-AB0715	3	3956	0.0758342
Bacteria	Acinetobacter calcoaceticus PHEA-2	4	3599	0.111142
Bacteria	Acinetobacter calcoaceticus ruh2202	2	3566	0.0560852
Bacteria	Acinetobacter genomosp. 13TU RUH2624	2	3631	0.0550812
Bacteria	Acinetobacter johnsonii SH046	2	3363	0.0594707
Bacteria	Acinetobacter junii SH205	2	3186	0.0627746
Bacteria	Acinetobacter lwoffii SH145	3	3134	0.0957243
Bacteria	Acinetobacter oleivorans DR1	3	3874	0.0774393
Bacteria	Acinetobacter radioresistens SH164	3	2874	0.104384
Bacteria	Acinetobacter sp. ADP1	2	3307	0.0604778
Bacteria	Acinetobacter sp. SH024	3	3631	0.0826219
Bacteria	Actinobacillus pleuropneumoniae serovar 3 str. JL03	0		0
Bacteria	Actinobacillus pleuropneumoniae serovar 5b str. L20	0		0
Bacteria	Actinobacillus pleuropneumoniae serovar 7 str. AP76	0		0
Bacteria	Actinobacillus succinogenes 130Z	0		0
Bacteria	Actinomyces graevenitzii C83	4	1853	0.215866
Bacteria	Actinomyces odontolyticus ATCC 17982	0		0
Bacteria	Actinomyces sp. F0330	0		0
Bacteria	Actinomyces viscosus C505	0		0
Bacteria	Actinoplanes missouriensis 431	1	8124	0.0123092
Bacteria	Actinoplanes sp. SE50/110	3	8247	0.0363769
Bacteria	Actinosynnema mirum DSM 43827	1	6916	0.0144592
Bacteria	Advenella kashmirensis WT001	2	3933	0.0508518
Bacteria	Aequorivita sublithincola DSM 14238	1	3140	0.0318471
Bacteria	Aerococcus urinae ACS-120-V-Col10a	0		0
Bacteria	Aeromonas hydrophila subsp. hydrophila ATCC 7966	0		0
Bacteria	Aeromonas salmonicida subsp. salmonicida A449	0		0
Bacteria	Aeromonas veronii B565	0		0
Bacteria	Aggregatibacter actinomycetemcomitans ANH9381	0		0
Bacteria	Aggregatibacter actinomycetemcomitans D7S-1	0		0
Bacteria	Aggregatibacter aphrophilus NJ8700	0		0
Bacteria	Agrobacterium radiobacter K84	4	6684	0.0598444
Bacteria	Agrobacterium sp. H13-3	1	5345	0.0187091
Bacteria	Agrobacterium tumefaciens str. C58	1	5355	0.0186741
Bacteria	Agrobacterium vitis S4	2	5389	0.0371126
Bacteria	Akkermansia muciniphila ATCC BAA-835	3	2138	0.140318
Bacteria	Alcanivorax borkumensis SK2	1	2755	0.0362976
Bacteria	Alicycliphilus denitrificans BC	1	4542	0.0220167
Bacteria	Alicycliphilus denitrificans K601	1	4696	0.0212947
Bacteria	Alicyclobacillus acidocaldarius subsp. acidocaldarius DSM 446	1	3084	0.0324254
Bacteria	Alicyclobacillus acidocaldarius subsp. acidocaldarius Tc-4-1	0		0
Bacteria	Aliivibrio salmonicida LFI1238	0		0
Bacteria	Alistipes finegoldii DSM 17242	0		0
Bacteria	Alkalilimnicola ehrlichii MLHE-1	1	2865	0.034904
Bacteria	Alkaliphilus metalliredigens QYMF	0		0
Bacteria	Alkaliphilus oremlandii OhILAs	0		0
Bacteria	Allochromatium vinosum DSM 180	3	3220	0.0931677
Bacteria	Alteromonas macleodii str. 'Deep ecotype'	0		0
Bacteria	Alteromonas sp. SN2	1	4371	0.0228781
Bacteria	Aminobacterium colombiense DSM 12261	0		0
Bacteria	Ammonifex degensii KC4	0		0
Bacteria	Amycolatopsis mediterranei S699	1	9222	0.0108436
Bacteria	Amycolatopsis mediterranei S699	1	9575	0.0104439
Bacteria	Amycolatopsis mediterranei U32	1	9228	0.0108366
Bacteria	Amycolicicoccus subflavus DQS3-9A1	1	4705	0.021254
Bacteria	Anabaena variabilis ATCC 29413	4	5710	0.0700525
Bacteria	Anaerobaculum mobile DSM 13181	0		0
Bacteria	Anaerococcus prevotii DSM 20548	0		0
Bacteria	Anaerolinea thermophila UNI-1	0		0
Bacteria	Anaeromyxobacter dehalogenans 2CP-1	0		0
Bacteria	Anaeromyxobacter dehalogenans 2CP-C	0		0
Bacteria	Anaeromyxobacter sp. Fw109-5	0		0
Bacteria	Anaeromyxobacter sp. K	0		0
Bacteria	Anaplasma centrale str. Israel	3	923	0.325027
Bacteria	Anaplasma marginale str. Florida	3	940	0.319149
Bacteria	Anaplasma marginale str. St. Maries	3	948	0.316456
Bacteria	Anaplasma phagocytophilum HZ	4	1264	0.316456
Bacteria	Anoxybacillus flavithermus WK1	1	2831	0.0353232
Bacteria	Aquifex aeolicus VF5	0		0
Bacteria	Arcanobacterium haemolyticum DSM 20595	0		0
Bacteria	Arcobacter butzleri ED-1	4	2158	0.185357
Bacteria	Arcobacter butzleri RM4018	4	2259	0.177069
Bacteria	Arcobacter nitrofigilis DSM 7299	3	3126	0.0959693
Bacteria	Arcobacter sp. L	5	2848	0.175562
Bacteria	Aromatoleum aromaticum EbN1	2	4579	0.0436777
Bacteria	Arthrobacter arilaitensis Re117	1	3436	0.0291036
Bacteria	Arthrobacter aurescens TC1	2	4588	0.043592
Bacteria	Arthrobacter chlorophenolicus A6	2	4590	0.043573
Bacteria	Arthrobacter phenanthrenivorans Sphe3	2	4131	0.0484144
Bacteria	Arthrobacter sp. FB24	2	4523	0.0442184
Bacteria	Aster yellows witches'-broom phytoplasma AYWB	0		0
Bacteria	Asticcacaulis excentricus CB 48	0		0
Bacteria	Atopobium parvulum DSM 20469	0		0
Bacteria	Azoarcus sp. BH72	3	3989	0.0752068
Bacteria	Azorhizobium caulinodans ORS 571	2	4717	0.0423998
Bacteria	Azospirillum brasilense Sp245	3	7557	0.0396983
Bacteria	Azospirillum lipoferum 4B	3	6349	0.0472515
Bacteria	Azospirillum sp. B510	2	6309	0.0317007
Bacteria	Azotobacter vinelandii DJ	2	5050	0.039604
Bacteria	Bacillus amyloliquefaciens DSM 7	0		0
Bacteria	Bacillus amyloliquefaciens FZB42	0		0
Bacteria	Bacillus amyloliquefaciens LL3	0		0
Bacteria	Bacillus amyloliquefaciens subsp. plantarum CAU B946	0		0
Bacteria	Bacillus amyloliquefaciens subsp. plantarum YAU B9601-Y2	0		0
Bacteria	Bacillus amyloliquefaciens TA208	0		0
Bacteria	Bacillus amyloliquefaciens XH7	0		0
Bacteria	Bacillus amyloliquefaciens Y2	0		0
Bacteria	Bacillus anthracis str. 'Ames Ancestor'	4	5484	0.0729395
Bacteria	Bacillus anthracis str. A0248	4	5292	0.0755858
Bacteria	Bacillus anthracis str. Ames	4	5328	0.0750751
Bacteria	Bacillus anthracis str. CDC 684	4	5902	0.0677736
Bacteria	Bacillus anthracis str. H9401	4	5791	0.0690727
Bacteria	Bacillus anthracis str. Sterne	4	5289	0.0756287
Bacteria	Bacillus atrophaeus 1942	0		0
Bacteria	Bacillus cellulosilyticus DSM 2522	1	4266	0.0234412
Bacteria	Bacillus cereus 03BB102	4	5606	0.0713521
Bacteria	Bacillus cereus AH187	2	5783	0.0345841
Bacteria	Bacillus cereus AH820	3	5810	0.0516351
Bacteria	Bacillus cereus ATCC 10987	3	5843	0.0513435
Bacteria	Bacillus cereus ATCC 14579	4	5255	0.076118
Bacteria	Bacillus cereus B4264	4	5398	0.0741015
Bacteria	Bacillus cereus biovar anthracis str. CI	3	5558	0.0539763
Bacteria	Bacillus cereus E33L	5	5641	0.0886368
Bacteria	Bacillus cereus F837/76	3	5468	0.0548647
Bacteria	Bacillus cereus G9842	4	5857	0.0682943
Bacteria	Bacillus cereus NC7401	2	5754	0.0347584
Bacteria	Bacillus cereus Q1	3	5489	0.0546548
Bacteria	Bacillus cereus subsp. cytotoxis NVH 391-98	1	3844	0.0260146
Bacteria	Bacillus clausii KSM-K16	1	4096	0.0244141
Bacteria	Bacillus coagulans 2-6	0		0
Bacteria	Bacillus coagulans 36D1	0		0
Bacteria	Bacillus halodurans C-125	0		0
Bacteria	Bacillus licheniformis DSM 13 = ATCC 14580	0		0
Bacteria	Bacillus licheniformis DSM 13 = ATCC 14580	0		0
Bacteria	Bacillus megaterium DSM 319	2	5100	0.0392157
Bacteria	Bacillus megaterium QM B1551	3	5612	0.0534569
Bacteria	Bacillus megaterium WSH-002	4	5274	0.0758438
Bacteria	Bacillus pseudofirmus OF4	0		0
Bacteria	Bacillus pumilus SAFR-032	0		0
Bacteria	Bacillus selenitireducens MLS10	0		0
Bacteria	Bacillus sp. JS	0		0
Bacteria	Bacillus subtilis BSn5	0		0
Bacteria	Bacillus subtilis subsp. spizizenii str. W23	0		0
Bacteria	Bacillus subtilis subsp. spizizenii TU-B-10	0		0
Bacteria	Bacillus subtilis subsp. subtilis str. 168	0		0
Bacteria	Bacillus subtilis subsp. subtilis str. RO-NN-1	0		0
Bacteria	Bacillus thuringiensis BMB171	4	5352	0.0747384
Bacteria	Bacillus thuringiensis serovar chinensis CT-43	5	6206	0.0805672
Bacteria	Bacillus thuringiensis serovar finitimus YBT-020	4	5782	0.0691802
Bacteria	Bacillus thuringiensis serovar konkukian str. 97-27	5	5197	0.0962094
Bacteria	Bacillus thuringiensis str. Al Hakam	4	4798	0.0833681
Bacteria	Bacillus weihenstephanensis KBAB4	5	5653	0.0884486
Bacteria	Bacteriovorax marinus SJ	4	3231	0.123801
Bacteria	Bacteroides fragilis 638R	0		0
Bacteria	Bacteroides fragilis NCTC 9343	0		0
Bacteria	Bacteroides fragilis YCH46	2	4624	0.0432526
Bacteria	Bacteroides helcogenes P 36-108	0		0
Bacteria	Bacteroides salanitronis DSM 18170	2	3641	0.05493
Bacteria	Bacteroides thetaiotaomicron VPI-5482	0		0
Bacteria	Bacteroides vulgatus ATCC 8482	0		0
Bacteria	Bartonella bacilliformis KC583	0		0
Bacteria	Bartonella clarridgeiae 73	0		0
Bacteria	Bartonella grahamii as4aup	0		0
Bacteria	Bartonella henselae str. Houston-1	0		0
Bacteria	Bartonella quintana str. Toulouse	0		0
Bacteria	Bartonella tribocorum CIP 105476	0		0
Bacteria	Baumannia cicadellinicola str. Hc (Homalodisca coagulata)	0		0
Bacteria	Bdellovibrio bacteriovorus HD100	4	3586	0.111545
Bacteria	Beijerinckia indica subsp. indica ATCC 9039	2	3784	0.0528541
Bacteria	Belliella baltica DSM 15883	0		0
Bacteria	Beutenbergia cavernae DSM 12333	3	4197	0.0714796
Bacteria	Bifidobacterium adolescentis ATCC 15703	0		0
Bacteria	Bifidobacterium animalis subsp. animalis ATCC 25527	0		0
Bacteria	Bifidobacterium animalis subsp. lactis AD011	0		0
Bacteria	Bifidobacterium animalis subsp. lactis B420	0		0
Bacteria	Bifidobacterium animalis subsp. lactis BB-12	0		0
Bacteria	Bifidobacterium animalis subsp. lactis Bi-07	0		0
Bacteria	Bifidobacterium animalis subsp. lactis Bl-04	0		0
Bacteria	Bifidobacterium animalis subsp. lactis BLC1	0		0
Bacteria	Bifidobacterium animalis subsp. lactis CNCM I-2494	0		0
Bacteria	Bifidobacterium animalis subsp. lactis DSM 10140	0		0
Bacteria	Bifidobacterium animalis subsp. lactis V9	0		0
Bacteria	Bifidobacterium bifidum BGN4	0		0
Bacteria	Bifidobacterium bifidum PRL2010	0		0
Bacteria	Bifidobacterium bifidum S17	0		0
Bacteria	Bifidobacterium breve ACS-071-V-Sch8b	0		0
Bacteria	Bifidobacterium dentium Bd1	0		0
Bacteria	Bifidobacterium longum DJO10A	0		0
Bacteria	Bifidobacterium longum NCC2705	0		0
Bacteria	Bifidobacterium longum subsp. infantis 157F	0		0
Bacteria	Bifidobacterium longum subsp. infantis ATCC 15697 = JCM 1222	0		0
Bacteria	Bifidobacterium longum subsp. infantis ATCC 15697 = JCM 1222	0		0
Bacteria	Bifidobacterium longum subsp. longum BBMN68	0		0
Bacteria	Bifidobacterium longum subsp. longum JCM 1217	0		0
Bacteria	Bifidobacterium longum subsp. longum JDM301	0		0
Bacteria	Bifidobacterium longum subsp. longum KACC 91563	0		0
Bacteria	Blastococcus saxobsidens DD2	2	4820	0.0414938
Bacteria	Blattabacterium sp. (Blaberus giganteus)	0		0
Bacteria	Blattabacterium sp. (Blattella germanica) str. Bge	0		0
Bacteria	Blattabacterium sp. (Cryptocercus punctulatus) str. Cpu	0		0
Bacteria	Blattabacterium sp. (Mastotermes darwiniensis) str. MADAR	0		0
Bacteria	Blattabacterium sp. (Periplaneta americana) str. BPLAN	0		0
Bacteria	Bordetella avium 197N	3	3381	0.0887311
Bacteria	Bordetella bronchiseptica RB50	2	4994	0.0400481
Bacteria	Bordetella parapertussis 12822	2	4185	0.0477897
Bacteria	Bordetella pertussis CS	2	3456	0.0578704
Bacteria	Bordetella pertussis Tohama I	2	3436	0.0582072
Bacteria	Bordetella petrii DSM 12804	1	5027	0.0198926
Bacteria	Borrelia afzelii PKo	2	1454	0.137552
Bacteria	Borrelia afzelii PKo	2	1271	0.157356
Bacteria	Borrelia bissettii DN127	2	1463	0.136705
Bacteria	Borrelia burgdorferi B31	2	1346	0.148588
Bacteria	Borrelia burgdorferi JD1	2	1458	0.137174
Bacteria	Borrelia burgdorferi N40	2	1242	0.161031
Bacteria	Borrelia burgdorferi ZS7	2	1239	0.161421
Bacteria	Borrelia crocidurae str. Achema	1	1470	0.0680272
Bacteria	Borrelia duttonii Ly	3	1305	0.229885
Bacteria	Borrelia garinii BgVir	2	956	0.209205
Bacteria	Borrelia garinii PBi	2	929	0.215285
Bacteria	Borrelia hermsii DAH	2	825	0.242424
Bacteria	Borrelia recurrentis A1	3	990	0.30303
Bacteria	Borrelia turicatae 91E135	1	818	0.122249
Bacteria	Brachybacterium faecium DSM 4810	1	3068	0.0325945
Bacteria	Brachyspira hyodysenteriae WA1	60	2642	2.27101
Bacteria	Brachyspira intermedia PWS/A	57	2872	1.98468
Bacteria	Brachyspira murdochii DSM 12563	48	2809	1.70879
Bacteria	Brachyspira pilosicoli 95/1000	32	2299	1.39191
Bacteria	Bradyrhizobium japonicum USDA 110	1	8317	0.0120236
Bacteria	Bradyrhizobium japonicum USDA 6	1	8826	0.0113302
Bacteria	Bradyrhizobium sp. BTAi1	1	7621	0.0131216
Bacteria	Bradyrhizobium sp. ORS 278	3	6717	0.0446628
Bacteria	Bradyrhizobium sp. S23321	1	6892	0.0145096
Bacteria	Brevibacillus brevis NBRC 100599	5	5947	0.084076
Bacteria	Brevundimonas subvibrioides ATCC 15264	0		0
Bacteria	Brucella abortus A13334	0		0
Bacteria	Brucella abortus bv. 1 str. 9-941	0		0
Bacteria	Brucella abortus S19	0		0
Bacteria	Brucella canis ATCC 23365	0		0
Bacteria	Brucella canis HSK A52141	0		0
Bacteria	Brucella melitensis ATCC 23457	0		0
Bacteria	Brucella melitensis biovar Abortus 2308	0		0
Bacteria	Brucella melitensis bv. 1 str. 16M	0		0
Bacteria	Brucella melitensis M28	0		0
Bacteria	Brucella melitensis M5-90	0		0
Bacteria	Brucella melitensis NI	0		0
Bacteria	Brucella microti CCM 4915	0		0
Bacteria	Brucella ovis ATCC 25840	0		0
Bacteria	Brucella pinnipedialis B2/94	0		0
Bacteria	Brucella suis 1330	0		0
Bacteria	Brucella suis 1330	0		0
Bacteria	Brucella suis ATCC 23445	0		0
Bacteria	Brucella suis VBI22	0		0
Bacteria	Buchnera aphidicola (Cinara tujafilina)	0		0
Bacteria	Buchnera aphidicola BCc	0		0
Bacteria	Buchnera aphidicola str. 5A (Acyrthosiphon pisum)	0		0
Bacteria	Buchnera aphidicola str. Ak (Acyrthosiphon kondoi)	0		0
Bacteria	Buchnera aphidicola str. APS (Acyrthosiphon pisum)	0		0
Bacteria	Buchnera aphidicola str. Bp (Baizongia pistaciae)	0		0
Bacteria	Buchnera aphidicola str. JF98 (Acyrthosiphon pisum)	0		0
Bacteria	Buchnera aphidicola str. LL01 (Acyrthosiphon pisum)	0		0
Bacteria	Buchnera aphidicola str. Sg (Schizaphis graminum)	0		0
Bacteria	Buchnera aphidicola str. TLW03 (Acyrthosiphon pisum)	0		0
Bacteria	Buchnera aphidicola str. Tuc7 (Acyrthosiphon pisum)	0		0
Bacteria	Buchnera aphidicola str. Ua (Uroleucon ambrosiae)	0		0
Bacteria	Burkholderia ambifaria AMMD	1	6610	0.0151286
Bacteria	Burkholderia ambifaria MC40-6	1	6697	0.0149321
Bacteria	Burkholderia cenocepacia AU 1054	3	6477	0.0463177
Bacteria	Burkholderia cenocepacia HI2424	4	6919	0.0578118
Bacteria	Burkholderia cenocepacia J2315	6	7116	0.084317
Bacteria	Burkholderia cenocepacia MC0-3	5	7008	0.071347
Bacteria	Burkholderia gladioli BSR3	3	7411	0.0404804
Bacteria	Burkholderia glumae BGR1	5	5773	0.0866101
Bacteria	Burkholderia mallei ATCC 23344	1	5023	0.0199084
Bacteria	Burkholderia mallei NCTC 10229	1	5509	0.0181521
Bacteria	Burkholderia mallei NCTC 10247	1	5415	0.0184672
Bacteria	Burkholderia mallei SAVP1	1	5184	0.0192901
Bacteria	Burkholderia multivorans ATCC 17616	2	6111	0.0327279
Bacteria	Burkholderia multivorans ATCC 17616	2	6258	0.0319591
Bacteria	Burkholderia phymatum STM815	3	7496	0.0400213
Bacteria	Burkholderia phytofirmans PsJN	2	7241	0.0276205
Bacteria	Burkholderia pseudomallei 1026b	1	6070	0.0164745
Bacteria	Burkholderia pseudomallei 1106a	1	7174	0.0139392
Bacteria	Burkholderia pseudomallei 1710b	1	6344	0.0157629
Bacteria	Burkholderia pseudomallei 668	1	7116	0.0140528
Bacteria	Burkholderia pseudomallei K96243	1	5728	0.0174581
Bacteria	Burkholderia pseudomallei MSHR346	1	7582	0.0131891
Bacteria	Burkholderia rhizoxinica HKI 454	4	3870	0.103359
Bacteria	Burkholderia sp. 383	6	7716	0.0777605
Bacteria	Burkholderia sp. CCGE1001	2	5965	0.0335289
Bacteria	Burkholderia sp. CCGE1002	5	6889	0.0725795
Bacteria	Burkholderia sp. CCGE1003	3	5988	0.0501002
Bacteria	Burkholderia sp. KJ006	5	6024	0.0830013
Bacteria	Burkholderia sp. YI23	3	7804	0.0384418
Bacteria	Burkholderia thailandensis E264	1	5632	0.0177557
Bacteria	Burkholderia vietnamiensis G4	37	7617	0.485756
Bacteria	Burkholderia xenovorans LB400	6	8702	0.0689497
Bacteria	Butyrivibrio proteoclasticus B316	1	3811	0.0262398
Bacteria	Caldicellulosiruptor bescii DSM 6725	0		0
Bacteria	Caldicellulosiruptor hydrothermalis 108	0		0
Bacteria	Caldicellulosiruptor kristjanssonii 177R1B	0		0
Bacteria	Caldicellulosiruptor kronotskyensis 2002	0		0
Bacteria	Caldicellulosiruptor lactoaceticus 6A	0		0
Bacteria	Caldicellulosiruptor obsidiansis OB47	0		0
Bacteria	Caldicellulosiruptor owensensis OL	0		0
Bacteria	Caldicellulosiruptor saccharolyticus DSM 8903	0		0
Bacteria	Caldilinea aerophila DSM 14535 = NBRC 104270	0		0
Bacteria	Caldisericum exile AZM16c01	0		0
Bacteria	Calditerrivibrio nitroreducens DSM 19672	0		0
Bacteria	Campylobacter concisus 13826	2	1989	0.100553
Bacteria	Campylobacter curvus 525.92	2	1934	0.103413
Bacteria	Campylobacter fetus subsp. fetus 82-40	2	1719	0.116347
Bacteria	Campylobacter hominis ATCC BAA-381	3	1687	0.17783
Bacteria	Campylobacter jejuni RM1221	2	1623	0.123229
Bacteria	Campylobacter jejuni subsp. doylei 269.97	2	1838	0.108814
Bacteria	Campylobacter jejuni subsp. jejuni 81-176	2	1731	0.11554
Bacteria	Campylobacter jejuni subsp. jejuni 81116	2	1758	0.113766
Bacteria	Campylobacter jejuni subsp. jejuni IA3902	3	1626	0.184502
Bacteria	Campylobacter jejuni subsp. jejuni ICDCCJ07001	2	1666	0.120048
Bacteria	Campylobacter jejuni subsp. jejuni M1	2	1534	0.130378
Bacteria	Campylobacter jejuni subsp. jejuni NCTC 11168 = ATCC 700819	3	1622	0.184957
Bacteria	Campylobacter jejuni subsp. jejuni S3	3	1783	0.168256
Bacteria	Campylobacter lari RM2100	2	1545	0.12945
Bacteria	Candidatus Accumulibacter phosphatis clade IIA str. UW-1	5	4562	0.109601
Bacteria	Candidatus Amoebophilus asiaticus 5a2	46	1334	3.44828
Bacteria	Candidatus Arthromitus sp. SFB-mouse-Japan	0		0
Bacteria	Candidatus Arthromitus sp. SFB-mouse-Yit	0		0
Bacteria	Candidatus Arthromitus sp. SFB-rat-Yit	0		0
Bacteria	Candidatus Azobacteroides pseudotrichonymphae genomovar. CFP2	0		0
Bacteria	Candidatus Blochmannia floridanus	0		0
Bacteria	Candidatus Blochmannia pennsylvanicus str. BPEN	0		0
Bacteria	Candidatus Blochmannia vafer str. BVAF	0		0
Bacteria	Candidatus Carsonella ruddii CE isolate Thao2000	0		0
Bacteria	Candidatus Carsonella ruddii CS isolate Thao2000	0		0
Bacteria	Candidatus Carsonella ruddii HC isolate Thao2000	0		0
Bacteria	Candidatus Carsonella ruddii HT isolate Thao2000	0		0
Bacteria	Candidatus Carsonella ruddii PC isolate NHV	0		0
Bacteria	Candidatus Carsonella ruddii PV	0		0
Bacteria	Candidatus Chloracidobacterium thermophilum B	2	3054	0.0654879
Bacteria	Candidatus Cloacamonas acidaminovorans	0		0
Bacteria	Candidatus Desulforudis audaxviator MP104C	0		0
Bacteria	Candidatus Hamiltonella defensa 5AT (Acyrthosiphon pisum)	0		0
Bacteria	Candidatus Hodgkinia cicadicola Dsem	0		0
Bacteria	Candidatus Koribacter versatilis Ellin345	4	4777	0.0837346
Bacteria	Candidatus Liberibacter asiaticus str. psy62	0		0
Bacteria	Candidatus Liberibacter solanacearum CLso-ZC1	0		0
Bacteria	Candidatus Methylomirabilis oxyfera	8	3072	0.260417
Bacteria	Candidatus Midichloria mitochondrii IricVA	8	1211	0.660611
Bacteria	Candidatus Moranella endobia PCIT	0		0
Bacteria	Candidatus Nitrospira defluvii	3	4268	0.0702905
Bacteria	Candidatus Pelagibacter sp. IMCC9063	0		0
Bacteria	Candidatus Pelagibacter ubique HTCC1062	0		0
Bacteria	Candidatus Phytoplasma australiense	0		0
Bacteria	Candidatus Phytoplasma mali	0		0
Bacteria	Candidatus Protochlamydia amoebophila UWE25	6	2031	0.295421
Bacteria	Candidatus Puniceispirillum marinum IMCC1322	0		0
Bacteria	Candidatus Rickettsia amblyommii str. GAT-30V	9	1390	0.647482
Bacteria	Candidatus Riesia pediculicola USDA	0		0
Bacteria	Candidatus Ruthia magnifica str. Cm (Calyptogena magnifica)	0		0
Bacteria	Candidatus Solibacter usitatus Ellin6076	16	7826	0.204447
Bacteria	Candidatus Sulcia muelleri CARI	0		0
Bacteria	Candidatus Sulcia muelleri DMIN	0		0
Bacteria	Candidatus Sulcia muelleri GWSS	0		0
Bacteria	Candidatus Sulcia muelleri SMDSEM	0		0
Bacteria	Candidatus Tremblaya princeps PCIT	0		0
Bacteria	Candidatus Tremblaya princeps PCVAL	0		0
Bacteria	Candidatus Vesicomyosocius okutanii HA	0		0
Bacteria	Candidatus Zinderia insecticola CARI	0		0
Bacteria	Capnocytophaga canimorsus Cc5	2	2404	0.0831947
Bacteria	Capnocytophaga ochracea DSM 7271	0		0
Bacteria	Carboxydothermus hydrogenoformans Z-2901	0		0
Bacteria	Carnobacterium sp. 17-4	0		0
Bacteria	Catenulispora acidiphila DSM 44928	1	8913	0.0112196
Bacteria	Caulobacter crescentus CB15	1	3737	0.0267594
Bacteria	Caulobacter crescentus NA1000	1	3877	0.0257931
Bacteria	Caulobacter segnis ATCC 21756	1	4139	0.0241604
Bacteria	Caulobacter sp. K31	2	5438	0.0367782
Bacteria	Cellulomonas fimi ATCC 484	0		0
Bacteria	Cellulomonas flavigena DSM 20109	0		0
Bacteria	Cellulophaga algicola DSM 14237	15	4163	0.360317
Bacteria	Cellulophaga lytica DSM 7489	0		0
Bacteria	Cellvibrio japonicus Ueda107	1	3750	0.0266667
Bacteria	Chitinophaga pinensis DSM 2588	6	7192	0.083426
Bacteria	Chlamydia muridarum Nigg	0		0
Bacteria	Chlamydia trachomatis 434/Bu	0		0
Bacteria	Chlamydia trachomatis A/HAR-13	0		0
Bacteria	Chlamydia trachomatis A2497	0		0
Bacteria	Chlamydia trachomatis A2497	0		0
Bacteria	Chlamydia trachomatis B/Jali20/OT	0		0
Bacteria	Chlamydia trachomatis B/TZ1A828/OT	0		0
Bacteria	Chlamydia trachomatis D-EC	0		0
Bacteria	Chlamydia trachomatis D-LC	0		0
Bacteria	Chlamydia trachomatis D/UW-3/CX	0		0
Bacteria	Chlamydia trachomatis E/11023	0		0
Bacteria	Chlamydia trachomatis E/150	0		0
Bacteria	Chlamydia trachomatis E/SW3	0		0
Bacteria	Chlamydia trachomatis F/SW4	0		0
Bacteria	Chlamydia trachomatis F/SW5	0		0
Bacteria	Chlamydia trachomatis G/11074	0		0
Bacteria	Chlamydia trachomatis G/11222	0		0
Bacteria	Chlamydia trachomatis G/9301	0		0
Bacteria	Chlamydia trachomatis G/9768	0		0
Bacteria	Chlamydia trachomatis L2b/UCH-1/proctitis	0		0
Bacteria	Chlamydia trachomatis L2c	0		0
Bacteria	Chlamydia trachomatis Sweden2	0		0
Bacteria	Chlamydophila abortus S26/3	0		0
Bacteria	Chlamydophila caviae GPIC	0		0
Bacteria	Chlamydophila felis Fe/C-56	0		0
Bacteria	Chlamydophila pecorum E58	0		0
Bacteria	Chlamydophila pneumoniae AR39	0		0
Bacteria	Chlamydophila pneumoniae CWL029	0		0
Bacteria	Chlamydophila pneumoniae J138	0		0
Bacteria	Chlamydophila pneumoniae LPCoLN	0		0
Bacteria	Chlamydophila pneumoniae TW-183	0		0
Bacteria	Chlamydophila psittaci 01DC11	0		0
Bacteria	Chlamydophila psittaci 02DC15	0		0
Bacteria	Chlamydophila psittaci 08DC60	0		0
Bacteria	Chlamydophila psittaci 6BC	0		0
Bacteria	Chlamydophila psittaci 6BC	0		0
Bacteria	Chlamydophila psittaci C19/98	0		0
Bacteria	Chlamydophila psittaci RD1	0		0
Bacteria	Chlorobaculum parvum NCIB 8327	0		0
Bacteria	Chlorobium chlorochromatii CaD3	1	1999	0.050025
Bacteria	Chlorobium limicola DSM 245	0		0
Bacteria	Chlorobium luteolum DSM 273	0		0
Bacteria	Chlorobium phaeobacteroides BS1	0		0
Bacteria	Chlorobium phaeobacteroides DSM 266	1	2650	0.0377358
Bacteria	Chlorobium phaeovibrioides DSM 265	0		0
Bacteria	Chlorobium tepidum TLS	0		0
Bacteria	Chloroflexus aggregans DSM 9485	0		0
Bacteria	Chloroflexus aurantiacus J-10-fl	0		0
Bacteria	Chloroflexus sp. Y-400-fl	0		0
Bacteria	Chloroherpeton thalassium ATCC 35110	0		0
Bacteria	Chromobacterium violaceum ATCC 12472	1	4405	0.0227015
Bacteria	Chromohalobacter salexigens DSM 3043	1	3298	0.0303214
Bacteria	Citrobacter koseri ATCC BAA-895	0		0
Bacteria	Citrobacter rodentium ICC168	1	4913	0.0203542
Bacteria	Clavibacter michiganensis subsp. michiganensis NCPPB 382	0		0
Bacteria	Clavibacter michiganensis subsp. sepedonicus	0		0
Bacteria	Clostridiales genomosp. BVAB3 str. UPII9-5	0		0
Bacteria	Clostridium acetobutylicum ATCC 824	2	3847	0.0519886
Bacteria	Clostridium acetobutylicum DSM 1731	2	3922	0.0509944
Bacteria	Clostridium acetobutylicum EA 2018	2	3916	0.0510725
Bacteria	Clostridium beijerinckii NCIMB 8052	2	5020	0.0398406
Bacteria	Clostridium botulinum A str. ATCC 19397	0		0
Bacteria	Clostridium botulinum A str. ATCC 3502	0		0
Bacteria	Clostridium botulinum A str. Hall	0		0
Bacteria	Clostridium botulinum A2 str. Kyoto	0		0
Bacteria	Clostridium botulinum A3 str. Loch Maree	0		0
Bacteria	Clostridium botulinum B str. Eklund 17B	1	3475	0.028777
Bacteria	Clostridium botulinum B1 str. Okra	0		0
Bacteria	Clostridium botulinum Ba4 str. 657	0		0
Bacteria	Clostridium botulinum BKT015925	0		0
Bacteria	Clostridium botulinum E3 str. Alaska E43	2	3257	0.0614062
Bacteria	Clostridium botulinum F str. 230613	0		0
Bacteria	Clostridium botulinum F str. Langeland	0		0
Bacteria	Clostridium botulinum H04402 065	0		0
Bacteria	Clostridium cellulolyticum H10	2	3390	0.0589971
Bacteria	Clostridium cellulovorans 743B	0		0
Bacteria	Clostridium clariflavum DSM 19732	0		0
Bacteria	Clostridium difficile 630	0		0
Bacteria	Clostridium difficile BI1	0		0
Bacteria	Clostridium difficile CD196	0		0
Bacteria	Clostridium difficile R20291	0		0
Bacteria	Clostridium kluyveri DSM 555	0		0
Bacteria	Clostridium kluyveri NBRC 12016	0		0
Bacteria	Clostridium lentocellum DSM 5427	0		0
Bacteria	Clostridium ljungdahlii DSM 13528	0		0
Bacteria	Clostridium novyi NT	0		0
Bacteria	Clostridium perfringens ATCC 13124	0		0
Bacteria	Clostridium perfringens SM101	0		0
Bacteria	Clostridium perfringens str. 13	0		0
Bacteria	Clostridium phytofermentans ISDg	1	3902	0.0256279
Bacteria	Clostridium saccharolyticum WM1	0		0
Bacteria	Clostridium sp. BNL1100	1	3920	0.0255102
Bacteria	Clostridium sp. SY8519	0		0
Bacteria	Clostridium sticklandii DSM 519	0		0
Bacteria	Clostridium tetani E88	0		0
Bacteria	Clostridium thermocellum ATCC 27405	1	3173	0.0315159
Bacteria	Clostridium thermocellum DSM 1313	1	2911	0.0343525
Bacteria	Collimonas fungivorans Ter331	2	4432	0.0451264
Bacteria	Colwellia psychrerythraea 34H	0		0
Bacteria	Comamonas testosteroni CNB-2	3	4891	0.0613371
Bacteria	Conexibacter woesei DSM 14684	1	5914	0.016909
Bacteria	Coprothermobacter proteolyticus DSM 5265	0		0
Bacteria	Coraliomargarita akajimensis DSM 45221	4	3120	0.128205
Bacteria	Corallococcus coralloides DSM 2259	6	8033	0.0746919
Bacteria	Coriobacterium glomerans PW2	0		0
Bacteria	Corynebacterium aurimucosum ATCC 700975	1	2614	0.0382555
Bacteria	Corynebacterium diphtheriae 241	1	2245	0.0445434
Bacteria	Corynebacterium diphtheriae 31A	0		0
Bacteria	Corynebacterium diphtheriae BH8	0		0
Bacteria	Corynebacterium diphtheriae C7 (beta)	0		0
Bacteria	Corynebacterium diphtheriae CDCE 8392	0		0
Bacteria	Corynebacterium diphtheriae HC01	0		0
Bacteria	Corynebacterium diphtheriae HC02	0		0
Bacteria	Corynebacterium diphtheriae HC03	0		0
Bacteria	Corynebacterium diphtheriae HC04	0		0
Bacteria	Corynebacterium diphtheriae INCA 402	1	2214	0.0451671
Bacteria	Corynebacterium diphtheriae NCTC 13129	1	2272	0.0440141
Bacteria	Corynebacterium diphtheriae PW8	0		0
Bacteria	Corynebacterium diphtheriae VA01	0		0
Bacteria	Corynebacterium efficiens YS-314	3	2994	0.1002
Bacteria	Corynebacterium glutamicum ATCC 13032	4	2993	0.133645
Bacteria	Corynebacterium glutamicum ATCC 13032	4	3057	0.130847
Bacteria	Corynebacterium glutamicum R	4	3080	0.12987
Bacteria	Corynebacterium jeikeium K411	0		0
Bacteria	Corynebacterium kroppenstedtii DSM 44385	0		0
Bacteria	Corynebacterium pseudotuberculosis 1/06-A	1	1963	0.0509424
Bacteria	Corynebacterium pseudotuberculosis 1002	1	2090	0.0478469
Bacteria	Corynebacterium pseudotuberculosis 258	1	2088	0.0478927
Bacteria	Corynebacterium pseudotuberculosis 267	1	2148	0.0465549
Bacteria	Corynebacterium pseudotuberculosis 3/99-5	1	2142	0.0466853
Bacteria	Corynebacterium pseudotuberculosis 31	1	2063	0.0484731
Bacteria	Corynebacterium pseudotuberculosis 316	1	2106	0.0474834
Bacteria	Corynebacterium pseudotuberculosis 42/02-A	1	2051	0.0487567
Bacteria	Corynebacterium pseudotuberculosis C231	1	2091	0.047824
Bacteria	Corynebacterium pseudotuberculosis CIP 52.97	1	2060	0.0485437
Bacteria	Corynebacterium pseudotuberculosis Cp162	1	2002	0.04995
Bacteria	Corynebacterium pseudotuberculosis FRC41	1	2110	0.0473934
Bacteria	Corynebacterium pseudotuberculosis I19	1	2095	0.0477327
Bacteria	Corynebacterium pseudotuberculosis P54B96	1	2084	0.0479846
Bacteria	Corynebacterium pseudotuberculosis PAT10	1	2079	0.0481
Bacteria	Corynebacterium resistens DSM 45100	0		0
Bacteria	Corynebacterium ulcerans 0102	1	2349	0.0425713
Bacteria	Corynebacterium ulcerans 809	1	2180	0.0458716
Bacteria	Corynebacterium ulcerans BR-AD22	1	2334	0.0428449
Bacteria	Corynebacterium urealyticum DSM 7109	0		0
Bacteria	Corynebacterium variabile DSM 44702	0		0
Bacteria	Coxiella burnetii CbuG_Q212	9	1866	0.482315
Bacteria	Coxiella burnetii CbuK_Q154	10	1942	0.514933
Bacteria	Coxiella burnetii Dugway 5J108-111	16	2045	0.782396
Bacteria	Coxiella burnetii RSA 331	13	1975	0.658228
Bacteria	Coxiella burnetii RSA 493	8	1847	0.433135
Bacteria	Croceibacter atlanticus HTCC2559	1	2702	0.0370096
Bacteria	Cronobacter sakazakii ATCC BAA-894	2	4422	0.0452284
Bacteria	Cronobacter sakazakii ES15	1	3916	0.0255363
Bacteria	Cronobacter turicensis z3032	2	4452	0.0449236
Bacteria	Cryptobacterium curtum DSM 15641	0		0
Bacteria	Cupriavidus metallidurans CH34	3	6477	0.0463177
Bacteria	Cupriavidus necator N-1	5	7832	0.0638407
Bacteria	Cupriavidus taiwanensis LMG 19424	3	5896	0.050882
Bacteria	cyanobacterium UCYN-A	0		0
Bacteria	Cyanothece sp. ATCC 51142	3	5304	0.0565611
Bacteria	Cyanothece sp. PCC 7424	2	5710	0.0350263
Bacteria	Cyanothece sp. PCC 7425	2	5327	0.0375446
Bacteria	Cyanothece sp. PCC 7822	1	6642	0.0150557
Bacteria	Cyanothece sp. PCC 8801	0		0
Bacteria	Cyanothece sp. PCC 8802	0		0
Bacteria	Cyclobacterium marinum DSM 745	0		0
Bacteria	Cytophaga hutchinsonii ATCC 33406	0		0
Bacteria	Dechloromonas aromatica RCB	6	4171	0.14385
Bacteria	Dechlorosoma suillum PS	4	3443	0.116178
Bacteria	Deferribacter desulfuricans SSM1	5	2374	0.210615
Bacteria	Dehalococcoides ethenogenes 195	0		0
Bacteria	Dehalococcoides sp. BAV1	0		0
Bacteria	Dehalococcoides sp. CBDB1	0		0
Bacteria	Dehalococcoides sp. GT	0		0
Bacteria	Dehalococcoides sp. VS	0		0
Bacteria	Dehalogenimonas lykanthroporepellens BL-DC-9	0		0
Bacteria	Deinococcus deserti VCD115	3	3459	0.0867303
Bacteria	Deinococcus geothermalis DSM 11300	1	3054	0.0327439
Bacteria	Deinococcus gobiensis I-0	5	4340	0.115207
Bacteria	Deinococcus maricopensis DSM 21211	2	3264	0.0612745
Bacteria	Deinococcus proteolyticus MRP	2	2656	0.0753012
Bacteria	Deinococcus radiodurans R1	3	3167	0.0947269
Bacteria	Delftia acidovorans SPH-1	3	6040	0.0496689
Bacteria	Delftia sp. Cs1-4	0		0
Bacteria	Denitrovibrio acetiphilus DSM 12809	1	2964	0.0337382
Bacteria	Desulfarculus baarsii DSM 2075	0		0
Bacteria	Desulfatibacillum alkenivorans AK-01	4	5252	0.0761615
Bacteria	Desulfitobacterium dehalogenans ATCC 51507	0		0
Bacteria	Desulfitobacterium hafniense DCB-2	0		0
Bacteria	Desulfitobacterium hafniense Y51	0		0
Bacteria	Desulfobacca acetoxidans DSM 11109	0		0
Bacteria	Desulfobacterium autotrophicum HRM2	2	4943	0.0404613
Bacteria	Desulfobulbus propionicus DSM 2032	0		0
Bacteria	Desulfococcus oleovorans Hxd3	5	3265	0.153139
Bacteria	Desulfohalobium retbaense DSM 5692	0		0
Bacteria	Desulfomicrobium baculatum DSM 4028	2	3436	0.0582072
Bacteria	Desulfomonile tiedjei DSM 6799	42	5494	0.76447
Bacteria	Desulfosporosinus acidiphilus SJ4	0		0
Bacteria	Desulfosporosinus orientis DSM 765	0		0
Bacteria	Desulfotalea psychrophila LSv54	0		0
Bacteria	Desulfotomaculum acetoxidans DSM 771	0		0
Bacteria	Desulfotomaculum carboxydivorans CO-1-SRB	1	2657	0.0376364
Bacteria	Desulfotomaculum kuznetsovii DSM 6115	0		0
Bacteria	Desulfotomaculum reducens MI-1	0		0
Bacteria	Desulfotomaculum ruminis DSM 2154	1	3796	0.0263435
Bacteria	Desulfovibrio aespoeensis Aspo-2	1	3304	0.0302663
Bacteria	Desulfovibrio africanus str. Walvis Bay	0		0
Bacteria	Desulfovibrio alaskensis G20	0		0
Bacteria	Desulfovibrio desulfuricans ND132	2	3454	0.0579039
Bacteria	Desulfovibrio desulfuricans subsp. desulfuricans str. ATCC 27774	0		0
Bacteria	Desulfovibrio magneticus RS-1	0		0
Bacteria	Desulfovibrio salexigens DSM 2638	2	3807	0.0525348
Bacteria	Desulfovibrio vulgaris RCH1	0		0
Bacteria	Desulfovibrio vulgaris str. 'Miyazaki F'	0		0
Bacteria	Desulfovibrio vulgaris str. Hildenborough	0		0
Bacteria	Desulfovibrio vulgaris subsp. vulgaris DP4	0		0
Bacteria	Desulfurispirillum indicum S5	0		0
Bacteria	Desulfurivibrio alkaliphilus AHT2	0		0
Bacteria	Desulfurobacterium thermolithotrophum DSM 11699	1	1509	0.0662691
Bacteria	Dichelobacter nodosus VCS1703A	2	1280	0.15625
Bacteria	Dickeya dadantii 3937	3	4549	0.0659486
Bacteria	Dickeya dadantii Ech586	3	4144	0.0723938
Bacteria	Dickeya dadantii Ech703	0		0
Bacteria	Dickeya zeae Ech1591	5	4163	0.120106
Bacteria	Dictyoglomus thermophilum H-6-12	0		0
Bacteria	Dictyoglomus turgidum DSM 6724	0		0
Bacteria	Dinoroseobacter shibae DFL 12	0		0
Bacteria	Dyadobacter fermentans DSM 18053	6	5719	0.104913
Bacteria	Edwardsiella ictaluri 93-146	0		0
Bacteria	Edwardsiella tarda EIB202	1	3591	0.0278474
Bacteria	Edwardsiella tarda FL6-60	0		0
Bacteria	Eggerthella lenta DSM 2243	0		0
Bacteria	Eggerthella sp. YY7918	0		0
Bacteria	Ehrlichia canis str. Jake	5	925	0.540541
Bacteria	Ehrlichia chaffeensis str. Arkansas	5	1105	0.452489
Bacteria	Ehrlichia ruminantium str. Gardel	5	950	0.526316
Bacteria	Ehrlichia ruminantium str. Welgevonden	4	958	0.417537
Bacteria	Ehrlichia ruminantium str. Welgevonden	4	888	0.45045
Bacteria	Elusimicrobium minutum Pei191	5	1529	0.327011
Bacteria	Enterobacter aerogenes KCTC 2190	1	4912	0.0203583
Bacteria	Enterobacter asburiae LF7a	1	4612	0.0216826
Bacteria	Enterobacter cloacae EcWSU1	2	4619	0.0432994
Bacteria	Enterobacter cloacae SCF1	2	4399	0.0454649
Bacteria	Enterobacter cloacae subsp. cloacae ATCC 13047	2	5518	0.036245
Bacteria	Enterobacter cloacae subsp. dissolvens SDM	2	4542	0.0440335
Bacteria	Enterobacter sp. 638	1	4240	0.0235849
Bacteria	Enterococcus faecalis 62	1	3075	0.0325203
Bacteria	Enterococcus faecalis D32	1	2965	0.0337268
Bacteria	Enterococcus faecalis OG1RF	1	2579	0.0387747
Bacteria	Enterococcus faecalis V583	1	3264	0.0306373
Bacteria	Enterococcus faecium Aus0004	0		0
Bacteria	Enterococcus faecium DO	0		0
Bacteria	Enterococcus hirae ATCC 9790	1	2755	0.0362976
Bacteria	Erwinia amylovora ATCC 49946	1	3565	0.0280505
Bacteria	Erwinia amylovora CFBP1430	1	3706	0.0269833
Bacteria	Erwinia billingiae Eb661	0		0
Bacteria	Erwinia pyrifoliae DSM 12163	1	4018	0.024888
Bacteria	Erwinia pyrifoliae Ep1/96	1	3697	0.027049
Bacteria	Erwinia sp. Ejp617	1	3672	0.0272331
Bacteria	Erwinia tasmaniensis Et1/99	2	3622	0.0552181
Bacteria	Erysipelothrix rhusiopathiae str. Fujisawa	1	1697	0.0589275
Bacteria	Erythrobacter litoralis HTCC2594	1	3011	0.0332116
Bacteria	Escherichia blattae DSM 4481	1	3904	0.0256148
Bacteria	Escherichia coli 'BL21-Gold(DE3)pLysS AG'	1	5519	0.0181192
Bacteria	Escherichia coli 042	3	5519	0.0543577
Bacteria	Escherichia coli 536	1	4619	0.0216497
Bacteria	Escherichia coli 55989	1	4759	0.0210128
Bacteria	Escherichia coli ABU 83972	1	4796	0.0208507
Bacteria	Escherichia coli APEC O1	1	4853	0.0206058
Bacteria	Escherichia coli ATCC 8739	1	4199	0.0238152
Bacteria	Escherichia coli B str. REL606	1	4204	0.0237869
Bacteria	Escherichia coli BL21(DE3)	1	4157	0.0240558
Bacteria	Escherichia coli BL21(DE3)	1	4204	0.0237869
Bacteria	Escherichia coli BW2952	1	4084	0.0244858
Bacteria	Escherichia coli CFT073	1	5369	0.0186254
Bacteria	Escherichia coli DH1	3	4259	0.0704391
Bacteria	Escherichia coli DH1	2	4160	0.0480769
Bacteria	Escherichia coli E24377A	4	4991	0.0801443
Bacteria	Escherichia coli ED1a	0		0
Bacteria	Escherichia coli ETEC H10407	3	4874	0.0615511
Bacteria	Escherichia coli HS	1	4377	0.0228467
Bacteria	Escherichia coli IAI1	1	4349	0.0229938
Bacteria	Escherichia coli IAI39	2	4730	0.0422833
Bacteria	Escherichia coli IHE3034	1	4757	0.0210217
Bacteria	Escherichia coli KO11FL	1	4709	0.0212359
Bacteria	Escherichia coli KO11FL	1	4653	0.0214915
Bacteria	Escherichia coli LF82	1	4376	0.0228519
Bacteria	Escherichia coli NA114	1	4873	0.0205212
Bacteria	Escherichia coli O103:H2 str. 12009	1	5121	0.0195274
Bacteria	Escherichia coli O111:H- str. 11128	1	5407	0.0184945
Bacteria	Escherichia coli O127:H6 str. E2348/69	1	4651	0.0215008
Bacteria	Escherichia coli O157:H7 str. EC4115	4	5477	0.0730327
Bacteria	Escherichia coli O157:H7 str. EDL933	3	5397	0.0555864
Bacteria	Escherichia coli O157:H7 str. Sakai	3	5318	0.0564122
Bacteria	Escherichia coli O157:H7 str. TW14359	4	5365	0.0745573
Bacteria	Escherichia coli O26:H11 str. 11368	1	5519	0.0181192
Bacteria	Escherichia coli O55:H7 str. CB9615	3	5121	0.0585823
Bacteria	Escherichia coli O55:H7 str. RM12579	3	5128	0.0585023
Bacteria	Escherichia coli O7:K1 str. CE10	2	5080	0.0393701
Bacteria	Escherichia coli O83:H1 str. NRG 857C	1	4582	0.0218245
Bacteria	Escherichia coli P12b	3	4393	0.0682905
Bacteria	Escherichia coli S88	1	4827	0.0207168
Bacteria	Escherichia coli SE11	2	4998	0.040016
Bacteria	Escherichia coli SE15	1	4488	0.0222816
Bacteria	Escherichia coli SMS-3-5	2	4912	0.0407166
Bacteria	Escherichia coli str. 'clone D i14'	1	4919	0.0203293
Bacteria	Escherichia coli str. 'clone D i2'	1	4919	0.0203293
Bacteria	Escherichia coli str. K-12 substr. DH10B	2	4128	0.0484496
Bacteria	Escherichia coli str. K-12 substr. MG1655	2	4146	0.0482393
Bacteria	Escherichia coli str. K-12 substr. W3110	2	4217	0.0474271
Bacteria	Escherichia coli UM146	1	4783	0.0209074
Bacteria	Escherichia coli UMN026	3	5014	0.0598325
Bacteria	Escherichia coli UMNK88	2	5607	0.0356697
Bacteria	Escherichia coli UTI89	1	5162	0.0193723
Bacteria	Escherichia coli W	1	4606	0.0217108
Bacteria	Escherichia coli W	1	4731	0.0211372
Bacteria	Escherichia coli Xuzhou21	3	5183	0.0578815
Bacteria	Escherichia fergusonii ATCC 35469	2	4318	0.0463177
Bacteria	Ethanoligenens harbinense YUAN-3	1	2701	0.0370233
Bacteria	Eubacterium eligens ATCC 27750	0		0
Bacteria	Eubacterium limosum KIST612	0		0
Bacteria	Eubacterium rectale ATCC 33656	1	3621	0.0276167
Bacteria	Exiguobacterium sibiricum 255-15	3	3015	0.0995025
Bacteria	Exiguobacterium sp. AT1b	1	3020	0.0331126
Bacteria	Ferrimonas balearica DSM 9799	1	3782	0.026441
Bacteria	Fervidobacterium nodosum Rt17-B1	0		0
Bacteria	Fervidobacterium pennivorans DSM 9078	0		0
Bacteria	Fibrobacter succinogenes subsp. succinogenes S85	2	2871	0.0696621
Bacteria	Fibrobacter succinogenes subsp. succinogenes S85	1	3085	0.0324149
Bacteria	Filifactor alocis ATCC 35896	1	1641	0.0609385
Bacteria	Finegoldia magna ATCC 29328	0		0
Bacteria	Flavobacteriaceae bacterium 3519-10	0		0
Bacteria	Flavobacterium branchiophilum FL-15	2	2872	0.0696379
Bacteria	Flavobacterium columnare ATCC 49512	2	2642	0.0757002
Bacteria	Flavobacterium indicum GPTSA100-9	2	2671	0.0748783
Bacteria	Flavobacterium johnsoniae UW101	6	5017	0.119593
Bacteria	Flavobacterium psychrophilum JIP02/86	1	2412	0.0414594
Bacteria	Flexibacter litoralis DSM 6794	0		0
Bacteria	Flexistipes sinusarabici DSM 4947	0		0
Bacteria	Fluviicola taffensis DSM 16823	3	4033	0.0743863
Bacteria	Francisella cf. novicida 3523	5	1854	0.269687
Bacteria	Francisella cf. novicida Fx1	1	1818	0.0550055
Bacteria	Francisella noatunensis subsp. orientalis str. Toba 04	1	1595	0.0626959
Bacteria	Francisella novicida U112	3	1719	0.17452
Bacteria	Francisella philomiragia subsp. philomiragia ATCC 25017	1	1915	0.0522193
Bacteria	Francisella sp. TX077308	1	1976	0.0506073
Bacteria	Francisella tularensis subsp. holarctica FTNF002-00	1	1581	0.0632511
Bacteria	Francisella tularensis subsp. holarctica LVS	1	1754	0.0570125
Bacteria	Francisella tularensis subsp. holarctica OSU18	1	1555	0.0643087
Bacteria	Francisella tularensis subsp. mediasiatica FSC147	0		0
Bacteria	Francisella tularensis subsp. tularensis FSC198	1	1605	0.0623053
Bacteria	Francisella tularensis subsp. tularensis NE061598	1	1836	0.0544662
Bacteria	Francisella tularensis subsp. tularensis SCHU S4	1	1604	0.0623441
Bacteria	Francisella tularensis subsp. tularensis TI0902	1	1544	0.0647668
Bacteria	Francisella tularensis subsp. tularensis TIGB03	1	1624	0.0615764
Bacteria	Francisella tularensis subsp. tularensis WY96-3418	1	1634	0.0611995
Bacteria	Frankia alni ACN14a	1	6707	0.0149098
Bacteria	Frankia sp. CcI3	0		0
Bacteria	Frankia sp. EAN1pec	0		0
Bacteria	Frankia sp. EuI1c	2	7083	0.0282366
Bacteria	Frankia symbiont of Datisca glomerata	0		0
Bacteria	Frateuria aurantia DSM 6220	1	3101	0.0322477
Bacteria	Fusobacterium nucleatum subsp. nucleatum ATCC 25586	3	2063	0.145419
Bacteria	Gallibacterium anatis UMN179	0		0
Bacteria	Gallionella capsiferriformans ES-2	2	2894	0.0691085
Bacteria	gamma proteobacterium HdN1	2	3763	0.0531491
Bacteria	Gardnerella vaginalis 409-05	0		0
Bacteria	Gardnerella vaginalis ATCC 14019	0		0
Bacteria	Gardnerella vaginalis HMP9231	0		0
Bacteria	Gemmatimonas aurantiaca T-27	8	3935	0.203304
Bacteria	Geobacillus kaustophilus HTA426	0		0
Bacteria	Geobacillus sp. C56-T3	0		0
Bacteria	Geobacillus sp. WCH70	0		0
Bacteria	Geobacillus sp. Y4.1MC1	0		0
Bacteria	Geobacillus sp. Y412MC52	0		0
Bacteria	Geobacillus sp. Y412MC61	0		0
Bacteria	Geobacillus thermodenitrificans NG80-2	0		0
Bacteria	Geobacillus thermoglucosidasius C56-YS93	0		0
Bacteria	Geobacillus thermoleovorans CCB_US3_UF5	0		0
Bacteria	Geobacter bemidjiensis Bem	2	4057	0.0492975
Bacteria	Geobacter daltonii FRC-32	1	3798	0.0263296
Bacteria	Geobacter lovleyi SZ	1	3685	0.027137
Bacteria	Geobacter metallireducens GS-15	5	3534	0.141483
Bacteria	Geobacter sp. M18	2	4434	0.045106
Bacteria	Geobacter sp. M21	7	4080	0.171569
Bacteria	Geobacter sulfurreducens KN400	2	3328	0.0600962
Bacteria	Geobacter sulfurreducens PCA	2	3428	0.0583431
Bacteria	Geobacter uraniireducens Rf4	3	4358	0.0688389
Bacteria	Geodermatophilus obscurus DSM 43160	2	4810	0.04158
Bacteria	Glaciecola nitratireducens FR1064	1	3654	0.0273673
Bacteria	Glaciecola sp. 4H-3-7+YE-5	1	4547	0.0219925
Bacteria	Gloeobacter violaceus PCC 7421	3	4430	0.0677201
Bacteria	Gluconacetobacter diazotrophicus PAl 5	2	3851	0.0519346
Bacteria	Gluconacetobacter diazotrophicus PAl 5	2	3501	0.0571265
Bacteria	Gluconacetobacter xylinus NBRC 3288	2	3195	0.0625978
Bacteria	Gluconobacter oxydans 621H	2	2664	0.0750751
Bacteria	Gordonia bronchialis DSM 43247	1	4696	0.0212947
Bacteria	Gordonia polyisoprenivorans VH2	1	5110	0.0195695
Bacteria	Gramella forsetii KT0803	0		0
Bacteria	Granulibacter bethesdensis CGDNIH1	2	2433	0.082203
Bacteria	Granulicella mallensis MP5ACTX8	6	4815	0.124611
Bacteria	Granulicella tundricola MP5ACTX9	1	4542	0.0220167
Bacteria	Haemophilus ducreyi 35000HP	0		0
Bacteria	Haemophilus influenzae 10810	0		0
Bacteria	Haemophilus influenzae 86-028NP	0		0
Bacteria	Haemophilus influenzae F3031	0		0
Bacteria	Haemophilus influenzae F3047	0		0
Bacteria	Haemophilus influenzae PittEE	0		0
Bacteria	Haemophilus influenzae PittGG	0		0
Bacteria	Haemophilus influenzae R2846	0		0
Bacteria	Haemophilus influenzae R2866	0		0
Bacteria	Haemophilus influenzae Rd KW20	0		0
Bacteria	Haemophilus parainfluenzae T3T1	1	1975	0.0506329
Bacteria	Haemophilus parasuis SH0165	0		0
Bacteria	Haemophilus somnus 129PT	0		0
Bacteria	Haemophilus somnus 2336	0		0
Bacteria	Hahella chejuensis KCTC 2396	6	6773	0.088587
Bacteria	Halanaerobium hydrogeniformans	1	2295	0.043573
Bacteria	Halanaerobium praevalens DSM 2228	1	2068	0.0483559
Bacteria	Haliangium ochraceum DSM 14365	0		0
Bacteria	Haliscomenobacter hydrossis DSM 1100	4	6752	0.0592417
Bacteria	Halobacillus halophilus DSM 2266	0		0
Bacteria	Halomonas elongata DSM 2581	0		0
Bacteria	Halorhodospira halophila SL1	2	2407	0.083091
Bacteria	Halothermothrix orenii H 168	1	2342	0.0426985
Bacteria	Halothiobacillus neapolitanus c2	0		0
Bacteria	Helicobacter acinonychis str. Sheeba	0		0
Bacteria	Helicobacter bizzozeronii CIII-1	0		0
Bacteria	Helicobacter cetorum MIT 00-7128	0		0
Bacteria	Helicobacter cetorum MIT 99-5656	0		0
Bacteria	Helicobacter cinaedi PAGU611	3	1923	0.156006
Bacteria	Helicobacter felis ATCC 49179	0		0
Bacteria	Helicobacter hepaticus ATCC 51449	13	1876	0.692964
Bacteria	Helicobacter mustelae 12198	2	1398	0.143062
Bacteria	Helicobacter pylori 2017	0		0
Bacteria	Helicobacter pylori 2018	0		0
Bacteria	Helicobacter pylori 26695	0		0
Bacteria	Helicobacter pylori 35A	0		0
Bacteria	Helicobacter pylori 51	0		0
Bacteria	Helicobacter pylori 52	0		0
Bacteria	Helicobacter pylori 83	0		0
Bacteria	Helicobacter pylori 908	0		0
Bacteria	Helicobacter pylori B38	0		0
Bacteria	Helicobacter pylori B8	0		0
Bacteria	Helicobacter pylori Cuz20	0		0
Bacteria	Helicobacter pylori ELS37	0		0
Bacteria	Helicobacter pylori F16	0		0
Bacteria	Helicobacter pylori F30	0		0
Bacteria	Helicobacter pylori F32	0		0
Bacteria	Helicobacter pylori F57	0		0
Bacteria	Helicobacter pylori G27	0		0
Bacteria	Helicobacter pylori Gambia94/24	0		0
Bacteria	Helicobacter pylori HPAG1	0		0
Bacteria	Helicobacter pylori HUP-B14	0		0
Bacteria	Helicobacter pylori India7	0		0
Bacteria	Helicobacter pylori J99	0		0
Bacteria	Helicobacter pylori Lithuania75	0		0
Bacteria	Helicobacter pylori P12	0		0
Bacteria	Helicobacter pylori PeCan18	0		0
Bacteria	Helicobacter pylori PeCan4	0		0
Bacteria	Helicobacter pylori Puno120	0		0
Bacteria	Helicobacter pylori Puno135	0		0
Bacteria	Helicobacter pylori Sat464	0		0
Bacteria	Helicobacter pylori Shi112	0		0
Bacteria	Helicobacter pylori Shi169	0		0
Bacteria	Helicobacter pylori Shi417	0		0
Bacteria	Helicobacter pylori Shi470	0		0
Bacteria	Helicobacter pylori SJM180	0		0
Bacteria	Helicobacter pylori SNT49	0		0
Bacteria	Helicobacter pylori SouthAfrica7	0		0
Bacteria	Helicobacter pylori v225d	0		0
Bacteria	Helicobacter pylori XZ274	0		0
Bacteria	Heliobacterium modesticaldum Ice1	0		0
Bacteria	Herbaspirillum seropedicae SmR1	1	4735	0.0211193
Bacteria	Herminiimonas arsenicoxydans	2	3295	0.060698
Bacteria	Herpetosiphon aurantiacus DSM 785	2	5279	0.037886
Bacteria	Hippea maritima DSM 10411	1	1677	0.0596303
Bacteria	Hirschia baltica ATCC 49814	0		0
Bacteria	Hydrogenobacter thermophilus TK-6	0		0
Bacteria	Hydrogenobacter thermophilus TK-6	0		0
Bacteria	Hydrogenobaculum sp. Y04AAS1	0		0
Bacteria	Hyphomicrobium denitrificans ATCC 51888	2	3512	0.0569476
Bacteria	Hyphomicrobium sp. MC1	2	4893	0.0408747
Bacteria	Hyphomonas neptunium ATCC 15444	0		0
Bacteria	Idiomarina loihiensis L2TR	0		0
Bacteria	Ignavibacterium album JCM 16511	0		0
Bacteria	Ilyobacter polytropus DSM 2926	2	2880	0.0694444
Bacteria	Intrasporangium calvum DSM 43043	1	3563	0.0280662
Bacteria	Isoptericola variabilis 225	2	2881	0.0694203
Bacteria	Isosphaera pallida ATCC 43644	1	3722	0.0268673
Bacteria	Jannaschia sp. CCS1	1	4283	0.0233481
Bacteria	Janthinobacterium sp. Marseille	3	3697	0.0811469
Bacteria	Jonesia denitrificans DSM 20603	0		0
Bacteria	Kangiella koreensis DSM 16069	0		0
Bacteria	Ketogulonicigenium vulgare Y25	1	3213	0.0311236
Bacteria	Ketogulonigenium vulgarum WSH-001	1	3054	0.0327439
Bacteria	Kineococcus radiotolerans SRS30216	2	4681	0.0427259
Bacteria	Kitasatospora setae KM-6054	3	7566	0.0396511
Bacteria	Klebsiella oxytoca E718	0		0
Bacteria	Klebsiella oxytoca KCTC 1686	0		0
Bacteria	Klebsiella pneumoniae 342	1	5768	0.017337
Bacteria	Klebsiella pneumoniae KCTC 2242	1	5152	0.0194099
Bacteria	Klebsiella pneumoniae NTUH-K2044	1	5262	0.0190042
Bacteria	Klebsiella pneumoniae subsp. pneumoniae HS11286	1	5779	0.017304
Bacteria	Klebsiella pneumoniae subsp. pneumoniae MGH 78578	1	5185	0.0192864
Bacteria	Klebsiella variicola At-22	1	5057	0.0197746
Bacteria	Kocuria rhizophila DC2201	1	2357	0.0424268
Bacteria	Kosmotoga olearia TBF 19.5.1	0		0
Bacteria	Kribbella flavida DSM 17836	3	6943	0.043209
Bacteria	Krokinobacter sp. 4H-3-7-5	3	2978	0.100739
Bacteria	Kyrpidia tusciae DSM 2912	0		0
Bacteria	Kytococcus sedentarius DSM 20547	1	2554	0.0391543
Bacteria	Lacinutrix sp. 5H-3-7-4	3	2967	0.101112
Bacteria	Lactobacillus acidophilus 30SC	0		0
Bacteria	Lactobacillus acidophilus NCFM	0		0
Bacteria	Lactobacillus amylovorus GRL 1112	0		0
Bacteria	Lactobacillus amylovorus GRL1118	0		0
Bacteria	Lactobacillus brevis ATCC 367	0		0
Bacteria	Lactobacillus buchneri NRRL B-30929	0		0
Bacteria	Lactobacillus casei ATCC 334	0		0
Bacteria	Lactobacillus casei BD-II	0		0
Bacteria	Lactobacillus casei BL23	0		0
Bacteria	Lactobacillus casei LC2W	0		0
Bacteria	Lactobacillus casei str. Zhang	0		0
Bacteria	Lactobacillus crispatus ST1	0		0
Bacteria	Lactobacillus delbrueckii subsp. bulgaricus 2038	0		0
Bacteria	Lactobacillus delbrueckii subsp. bulgaricus ATCC 11842	0		0
Bacteria	Lactobacillus delbrueckii subsp. bulgaricus ATCC BAA-365	0		0
Bacteria	Lactobacillus delbrueckii subsp. bulgaricus ND02	0		0
Bacteria	Lactobacillus fermentum CECT 5716	0		0
Bacteria	Lactobacillus fermentum IFO 3956	0		0
Bacteria	Lactobacillus gasseri ATCC 33323	0		0
Bacteria	Lactobacillus helveticus DPC 4571	0		0
Bacteria	Lactobacillus helveticus H10	0		0
Bacteria	Lactobacillus johnsonii DPC 6026	0		0
Bacteria	Lactobacillus johnsonii FI9785	0		0
Bacteria	Lactobacillus johnsonii NCC 533	0		0
Bacteria	Lactobacillus kefiranofaciens ZW3	0		0
Bacteria	Lactobacillus plantarum JDM1	1	2948	0.0339213
Bacteria	Lactobacillus plantarum subsp. plantarum ST-III	1	3038	0.0329164
Bacteria	Lactobacillus plantarum WCFS1	1	3158	0.0316656
Bacteria	Lactobacillus reuteri DSM 20016	0		0
Bacteria	Lactobacillus reuteri JCM 1112	0		0
Bacteria	Lactobacillus reuteri SD2112	0		0
Bacteria	Lactobacillus rhamnosus ATCC 8530	0		0
Bacteria	Lactobacillus rhamnosus GG	0		0
Bacteria	Lactobacillus rhamnosus GG	0		0
Bacteria	Lactobacillus rhamnosus Lc 705	0		0
Bacteria	Lactobacillus ruminis ATCC 27782	0		0
Bacteria	Lactobacillus sakei subsp. sakei 23K	0		0
Bacteria	Lactobacillus salivarius CECT 5713	0		0
Bacteria	Lactobacillus salivarius UCC118	0		0
Bacteria	Lactobacillus sanfranciscensis TMW 1.1304	0		0
Bacteria	Lactococcus garvieae ATCC 49156	1	1947	0.0513611
Bacteria	Lactococcus garvieae Lg2	1	1968	0.050813
Bacteria	Lactococcus lactis subsp. cremoris A76	0		0
Bacteria	Lactococcus lactis subsp. cremoris MG1363	0		0
Bacteria	Lactococcus lactis subsp. cremoris NZ9000	0		0
Bacteria	Lactococcus lactis subsp. cremoris SK11	0		0
Bacteria	Lactococcus lactis subsp. lactis CV56	0		0
Bacteria	Lactococcus lactis subsp. lactis Il1403	0		0
Bacteria	Lactococcus lactis subsp. lactis KF147	0		0
Bacteria	Laribacter hongkongensis HLHK9	0		0
Bacteria	Lawsonia intracellularis PHE/MN1-00	0		0
Bacteria	Leadbetterella byssophila DSM 17132	1	3465	0.02886
Bacteria	Legionella longbeachae NSW150	26	3470	0.74928
Bacteria	Legionella pneumophila 2300/99 Alcoy	17	3190	0.532915
Bacteria	Legionella pneumophila str. Corby	17	3204	0.530587
Bacteria	Legionella pneumophila str. Lens	19	2934	0.64758
Bacteria	Legionella pneumophila str. Paris	21	3166	0.663298
Bacteria	Legionella pneumophila subsp. pneumophila	19
Bacteria	Legionella pneumophila subsp. pneumophila	17
Bacteria	Legionella pneumophila subsp. pneumophila ATCC 43290	15	2926	0.512645
Bacteria	Legionella pneumophila subsp. pneumophila str. Philadelphia 1	15	2943	0.509684
Bacteria	Leifsonia xyli subsp. xyli str. CTCB07	2	2030	0.0985222
Bacteria	Leptospira biflexa serovar Patoc strain 'Patoc 1 (Ames)'	15	3600	0.416667
Bacteria	Leptospira biflexa serovar Patoc strain 'Patoc 1 (Paris)'	15	3726	0.402576
Bacteria	Leptospira borgpetersenii serovar Hardjo-bovis str. JB197	8	2880	0.277778
Bacteria	Leptospira borgpetersenii serovar Hardjo-bovis str. L550	5	2945	0.169779
Bacteria	Leptospira interrogans serovar Copenhageni str. Fiocruz L1-130	13	3667	0.354513
Bacteria	Leptospira interrogans serovar Lai str. 56601	15	3702	0.405186
Bacteria	Leptospira interrogans serovar Lai str. IPAV	15	3711	0.404204
Bacteria	Leptospirillum ferrooxidans C2-3	0		0
Bacteria	Leptothrix cholodnii SP-6	1	4363	0.02292
Bacteria	Leptotrichia buccalis C-1013-b	2	2220	0.0900901
Bacteria	Leuconostoc citreum KM20	0		0
Bacteria	Leuconostoc gasicomitatum LMG 18811	0		0
Bacteria	Leuconostoc kimchii IMSNU 11154	0		0
Bacteria	Leuconostoc mesenteroides subsp. mesenteroides ATCC 8293	0		0
Bacteria	Leuconostoc mesenteroides subsp. mesenteroides J18	0		0
Bacteria	Leuconostoc sp. C2	0		0
Bacteria	Listeria innocua Clip11262	0		0
Bacteria	Listeria ivanovii subsp. ivanovii PAM 55	0		0
Bacteria	Listeria monocytogenes 07PF0776	0		0
Bacteria	Listeria monocytogenes 08-5578	0		0
Bacteria	Listeria monocytogenes 08-5923	0		0
Bacteria	Listeria monocytogenes 10403S	0		0
Bacteria	Listeria monocytogenes EGD-e	0		0
Bacteria	Listeria monocytogenes Finland 1998	0		0
Bacteria	Listeria monocytogenes FSL R2-561	0		0
Bacteria	Listeria monocytogenes HCC23	1	2974	0.0336247
Bacteria	Listeria monocytogenes J0161	0		0
Bacteria	Listeria monocytogenes L99	1	2925	0.034188
Bacteria	Listeria monocytogenes M7	1	2977	0.0335909
Bacteria	Listeria monocytogenes serotype 4b str. CLIP 80459	0		0
Bacteria	Listeria monocytogenes serotype 4b str. F2365	0		0
Bacteria	Listeria seeligeri serovar 1/2b str. SLCC3954	0		0
Bacteria	Listeria welshimeri serovar 6b str. SLCC5334	0		0
Bacteria	Lysinibacillus sphaericus C3-41	4	4771	0.0838399
Bacteria	Macrococcus caseolyticus JCSC5402	0		0
Bacteria	Magnetococcus marinus MC-1	5	3716	0.134553
Bacteria	Magnetospirillum magneticum AMB-1	2	4561	0.04385
Bacteria	Mahella australiensis 50-1 BON	0		0
Bacteria	Maribacter sp. HTCC2170	2	3411	0.0586338
Bacteria	Maricaulis maris MCS10	2	3063	0.0652955
Bacteria	Marinithermus hydrothermalis DSM 14884	1	2205	0.0453515
Bacteria	Marinitoga piezophila KA3	1	2046	0.0488759
Bacteria	Marinobacter adhaerens HP15	3	4410	0.0680272
Bacteria	Marinobacter aquaeolei VT8	0		0
Bacteria	Marinobacter hydrocarbonoclasticus ATCC 49840	2	3786	0.0528262
Bacteria	Marinomonas mediterranea MMB-1	1	4121	0.024266
Bacteria	Marinomonas posidonica IVIA-Po-181	1	3491	0.0286451
Bacteria	Marinomonas sp. MWYL1	0		0
Bacteria	Marivirga tractuosa DSM 4126	3	3757	0.0798509
Bacteria	Megasphaera elsdenii DSM 20460	0		0
Bacteria	Meiothermus ruber DSM 1279	1	3014	0.0331785
Bacteria	Meiothermus silvanus DSM 9946	2	3505	0.0570613
Bacteria	Melioribacter roseus P3M	0		0
Bacteria	Melissococcus plutonius ATCC 35311	0		0
Bacteria	Melissococcus plutonius DAT561	0		0
Bacteria	Mesoplasma florum L1	0		0
Bacteria	Mesorhizobium ciceri biovar biserrulae WSM1271	2	6264	0.0319285
Bacteria	Mesorhizobium loti MAFF303099	1	7272	0.0137514
Bacteria	Mesorhizobium opportunistum WSM2075	1	6508	0.0153657
Bacteria	Mesorhizobium sp. BNC1	0		0
Bacteria	Mesotoga prima MesG1.Ag.4.2	1	2574	0.03885
Bacteria	Methylacidiphilum infernorum V4	0		0
Bacteria	Methylibium petroleiphilum PM1	2	4449	0.0449539
Bacteria	Methylobacillus flagellatus KT	3	2753	0.108972
Bacteria	Methylobacterium chloromethanicum CM4	1	5516	0.0181291
Bacteria	Methylobacterium extorquens AM1	1	6212	0.0160979
Bacteria	Methylobacterium extorquens DM4	1	5736	0.0174338
Bacteria	Methylobacterium extorquens PA1	1	4829	0.0207082
Bacteria	Methylobacterium nodulans ORS 2060	1	8308	0.0120366
Bacteria	Methylobacterium populi BJ001	1	5365	0.0186393
Bacteria	Methylobacterium radiotolerans JCM 2831	2	6431	0.0310994
Bacteria	Methylobacterium sp. 4-46	1	6692	0.0149432
Bacteria	Methylocella silvestris BL2	2	3818	0.0523834
Bacteria	Methylococcus capsulatus str. Bath	3	2956	0.101488
Bacteria	Methylomicrobium alcaliphilum	2	3981	0.0502386
Bacteria	Methylomonas methanica MC09	3	4494	0.0667557
Bacteria	Methylophaga sp. JAM1	1	3022	0.0330907
Bacteria	Methylophaga sp. JAM7	1	2691	0.0371609
Bacteria	Methylotenera mobilis JLW8	3	2338	0.128315
Bacteria	Methylotenera versatilis 301	2	2764	0.0723589
Bacteria	Methylovorus glucosetrophus SIP3-4	3	2909	0.103128
Bacteria	Methylovorus sp. MP688	2	2712	0.0737463
Bacteria	Micavibrio aeruginosavorus ARL-13	3	2432	0.123355
Bacteria	Microbacterium testaceum StLB037	0		0
Bacteria	Micrococcus luteus NCTC 2665	1	2236	0.0447227
Bacteria	Microcystis aeruginosa NIES-843	1	6312	0.0158428
Bacteria	Microlunatus phosphovorus NM-1	3	5338	0.0562008
Bacteria	Micromonospora aurantiaca ATCC 27029	1	6222	0.016072
Bacteria	Micromonospora sp. L5	1	6150	0.0162602
Bacteria	Mobiluncus curtisii ATCC 43063	0		0
Bacteria	Modestobacter marinus	1	5444	0.0183688
Bacteria	Moorella thermoacetica ATCC 39073	0		0
Bacteria	Moraxella catarrhalis RH4	0		0
Bacteria	Muricauda ruestringensis DSM 13258	2	3432	0.0582751
Bacteria	Mycobacterium abscessus ATCC 19977	1	4941	0.0202388
Bacteria	Mycobacterium africanum GM041182	0		0
Bacteria	Mycobacterium avium 104	0		0
Bacteria	Mycobacterium avium subsp. paratuberculosis K-10	0		0
Bacteria	Mycobacterium bovis AF2122/97	0		0
Bacteria	Mycobacterium bovis BCG str. Mexico	0		0
Bacteria	Mycobacterium bovis BCG str. Pasteur 1173P2	0		0
Bacteria	Mycobacterium bovis BCG str. Tokyo 172	0		0
Bacteria	Mycobacterium canettii CIPT 140010059	0		0
Bacteria	Mycobacterium chubuense NBB4	0		0
Bacteria	Mycobacterium gilvum PYR-GCK	0		0
Bacteria	Mycobacterium gilvum Spyr1	0		0
Bacteria	Mycobacterium intracellulare ATCC 13950	0		0
Bacteria	Mycobacterium intracellulare MOTT-02	0		0
Bacteria	Mycobacterium intracellulare MOTT-64	0		0
Bacteria	Mycobacterium leprae Br4923	0		0
Bacteria	Mycobacterium leprae TN	0		0
Bacteria	Mycobacterium marinum M	0		0
Bacteria	Mycobacterium massiliense str. GO 06	0		0
Bacteria	Mycobacterium rhodesiae NBB3	2	6147	0.0325362
Bacteria	Mycobacterium smegmatis str. MC2 155	1	6717	0.0148876
Bacteria	Mycobacterium smegmatis str. MC2 155	1	6690	0.0149477
Bacteria	Mycobacterium sp. JDM601	2	4346	0.0460193
Bacteria	Mycobacterium sp. JLS	0		0
Bacteria	Mycobacterium sp. KMS	2	5975	0.0334728
Bacteria	Mycobacterium sp. MCS	2	5615	0.0356189
Bacteria	Mycobacterium sp. MOTT36Y	0		0
Bacteria	Mycobacterium tuberculosis CCDC5079	0		0
Bacteria	Mycobacterium tuberculosis CCDC5180	0		0
Bacteria	Mycobacterium tuberculosis CDC1551	0		0
Bacteria	Mycobacterium tuberculosis CTRI-2	0		0
Bacteria	Mycobacterium tuberculosis F11	0		0
Bacteria	Mycobacterium tuberculosis H37Ra	0		0
Bacteria	Mycobacterium tuberculosis H37Rv	0		0
Bacteria	Mycobacterium tuberculosis H37Rv	0		0
Bacteria	Mycobacterium tuberculosis KZN 1435	0		0
Bacteria	Mycobacterium tuberculosis KZN 4207	0		0
Bacteria	Mycobacterium tuberculosis KZN 605	0		0
Bacteria	Mycobacterium tuberculosis RGTB327	0		0
Bacteria	Mycobacterium tuberculosis RGTB423	0		0
Bacteria	Mycobacterium tuberculosis UT205	0		0
Bacteria	Mycobacterium ulcerans Agy99	0		0
Bacteria	Mycobacterium vanbaalenii PYR-1	0		0
Bacteria	Mycoplasma agalactiae	0		0
Bacteria	Mycoplasma agalactiae PG2	0		0
Bacteria	Mycoplasma arthritidis 158L3-1	0		0
Bacteria	Mycoplasma bovis HB0801	0		0
Bacteria	Mycoplasma bovis Hubei-1	0		0
Bacteria	Mycoplasma bovis PG45	0		0
Bacteria	Mycoplasma capricolum subsp. capricolum ATCC 27343	0		0
Bacteria	Mycoplasma conjunctivae HRC/581	0		0
Bacteria	Mycoplasma crocodyli MP145	0		0
Bacteria	Mycoplasma fermentans JER	0		0
Bacteria	Mycoplasma fermentans M64	0		0
Bacteria	Mycoplasma gallisepticum str. F	0		0
Bacteria	Mycoplasma gallisepticum str. R(high)	0		0
Bacteria	Mycoplasma gallisepticum str. R(low)	0		0
Bacteria	Mycoplasma genitalium G37	0		0
Bacteria	Mycoplasma haemocanis str. Illinois	0		0
Bacteria	Mycoplasma haemofelis Ohio2	0		0
Bacteria	Mycoplasma haemofelis str. Langford 1	0		0
Bacteria	Mycoplasma hominis ATCC 23114	0		0
Bacteria	Mycoplasma hyopneumoniae 168	0		0
Bacteria	Mycoplasma hyopneumoniae 232	0		0
Bacteria	Mycoplasma hyopneumoniae 7448	0		0
Bacteria	Mycoplasma hyopneumoniae J	0		0
Bacteria	Mycoplasma hyorhinis GDL-1	0		0
Bacteria	Mycoplasma hyorhinis HUB-1	0		0
Bacteria	Mycoplasma hyorhinis MCLD	0		0
Bacteria	Mycoplasma leachii 99/014/6	0		0
Bacteria	Mycoplasma leachii PG50	0		0
Bacteria	Mycoplasma mobile 163K	0		0
Bacteria	Mycoplasma mycoides subsp. capri LC str. 95010	0		0
Bacteria	Mycoplasma mycoides subsp. mycoides SC str. PG1	0		0
Bacteria	Mycoplasma penetrans HF-2	0		0
Bacteria	Mycoplasma pneumoniae 309	0		0
Bacteria	Mycoplasma pneumoniae FH	0		0
Bacteria	Mycoplasma pneumoniae M129	0		0
Bacteria	Mycoplasma pulmonis UAB CTIP	0		0
Bacteria	Mycoplasma putrefaciens KS1	0		0
Bacteria	Mycoplasma suis KI3806	0		0
Bacteria	Mycoplasma suis str. Illinois	0		0
Bacteria	Mycoplasma synoviae 53	0		0
Bacteria	Mycoplasma wenyonii str. Massachusetts	0		0
Bacteria	Myxococcus fulvus HW-1	4	7284	0.0549149
Bacteria	Myxococcus xanthus DK 1622	7	7316	0.0956807
Bacteria	Nakamurella multipartita DSM 44233	2	5240	0.0381679
Bacteria	Natranaerobius thermophilus JW/NM-WN-LF	1	2906	0.0344116
Bacteria	Nautilia profundicola AmH	0		0
Bacteria	Neisseria gonorrhoeae FA 1090	1	2002	0.04995
Bacteria	Neisseria gonorrhoeae NCCP11945	1	2680	0.0373134
Bacteria	Neisseria gonorrhoeae TCDC-NG08107	1	2196	0.0455373
Bacteria	Neisseria lactamica 020-06	2	1972	0.10142
Bacteria	Neisseria meningitidis 053442	1	2020	0.049505
Bacteria	Neisseria meningitidis 8013	0		0
Bacteria	Neisseria meningitidis alpha14	1	1872	0.0534188
Bacteria	Neisseria meningitidis alpha710	1	2017	0.0495786
Bacteria	Neisseria meningitidis FAM18	1	1917	0.0521648
Bacteria	Neisseria meningitidis G2136	1	1928	0.0518672
Bacteria	Neisseria meningitidis H44/76	1	1961	0.0509944
Bacteria	Neisseria meningitidis M01-240149	1	1936	0.0516529
Bacteria	Neisseria meningitidis M01-240355	1	1971	0.0507357
Bacteria	Neisseria meningitidis M04-240196	1	1947	0.0513611
Bacteria	Neisseria meningitidis MC58	2	2063	0.0969462
Bacteria	Neisseria meningitidis NZ-05/33	1	1948	0.0513347
Bacteria	Neisseria meningitidis WUE 2594	0		0
Bacteria	Neisseria meningitidis Z2491	1	1909	0.0523834
Bacteria	Neorickettsia risticii str. Illinois	4	892	0.44843
Bacteria	Neorickettsia sennetsu str. Miyayama	3	932	0.321888
Bacteria	Niastella koreensis GR20-10	4	7174	0.0557569
Bacteria	Nitratifractor salsuginis DSM 16511	2	2088	0.0957854
Bacteria	Nitratiruptor sp. SB155-2	2	1843	0.108519
Bacteria	Nitrobacter hamburgensis X14	1	4326	0.023116
Bacteria	Nitrobacter winogradskyi Nb-255	0		0
Bacteria	Nitrosococcus halophilus Nc4	0		0
Bacteria	Nitrosococcus oceani ATCC 19707	0		0
Bacteria	Nitrosococcus watsonii C-113	0		0
Bacteria	Nitrosomonas europaea ATCC 19718	2	2461	0.0812678
Bacteria	Nitrosomonas eutropha C91	2	2551	0.0784006
Bacteria	Nitrosomonas sp. AL212	3	2983	0.10057
Bacteria	Nitrosomonas sp. Is79A3	3	3372	0.088968
Bacteria	Nitrosospira multiformis ATCC 25196	1	2805	0.0356506
Bacteria	Nocardia cyriacigeorgica GUH-2	2	5477	0.0365163
Bacteria	Nocardia farcinica IFM 10152	1	5934	0.016852
Bacteria	Nocardioides sp. JS614	0		0
Bacteria	Nocardiopsis dassonvillei subsp. dassonvillei DSM 43111	1	5497	0.0181917
Bacteria	Nostoc azollae' 0708	1	3651	0.0273898
Bacteria	Nostoc punctiforme PCC 73102	2	6689	0.0298998
Bacteria	Nostoc sp. PCC 7120	3	6129	0.0489476
Bacteria	Novosphingobium aromaticivorans DSM 12444	1	3937	0.0254001
Bacteria	Novosphingobium sp. PP1Y	1	4664	0.0214408
Bacteria	Oceanimonas sp. GK1	1	3221	0.0310463
Bacteria	Oceanithermus profundus DSM 14977	3	2373	0.126422
Bacteria	Oceanobacillus iheyensis HTE831	0		0
Bacteria	Ochrobactrum anthropi ATCC 49188	1	4799	0.0208377
Bacteria	Odoribacter splanchnicus DSM 20712	0		0
Bacteria	Oenococcus oeni PSU-1	0		0
Bacteria	Oligotropha carboxidovorans OM4	2	3574	0.0559597
Bacteria	Oligotropha carboxidovorans OM5	2	3722	0.0537346
Bacteria	Oligotropha carboxidovorans OM5	2	3629	0.0551116
Bacteria	Olsenella uli DSM 7084	0		0
Bacteria	Onion yellows phytoplasma OY-M	0		0
Bacteria	Opitutus terrae PB90-1	2	4612	0.0433651
Bacteria	Orientia tsutsugamushi str. Boryong	37	1182	3.13029
Bacteria	Orientia tsutsugamushi str. Ikeda	47	1967	2.38943
Bacteria	Ornithobacterium rhinotracheale DSM 15997	0		0
Bacteria	Oscillibacter valericigenes Sjm18-20	0		0
Bacteria	Owenweeksia hongkongensis DSM 17368	3	3485	0.0860832
Bacteria	Paenibacillus mucilaginosus 3016	4	7057	0.0566813
Bacteria	Paenibacillus mucilaginosus K02	3	7252	0.0413679
Bacteria	Paenibacillus mucilaginosus KNP414	3	7811	0.0384074
Bacteria	Paenibacillus polymyxa E681	1	4805	0.0208117
Bacteria	Paenibacillus polymyxa M1	3	3508	0.0855188
Bacteria	Paenibacillus polymyxa SC2	3	6032	0.0497347
Bacteria	Paenibacillus sp. JDR-2	3	6213	0.0482859
Bacteria	Paenibacillus sp. Y412MC10	4	6238	0.0641231
Bacteria	Paenibacillus terrae HPL-003	0		0
Bacteria	Paludibacter propionicigenes WB4	0		0
Bacteria	Pantoea ananatis AJ13355	0		0
Bacteria	Pantoea ananatis LMG 20103	0		0
Bacteria	Pantoea ananatis LMG 5342	0		0
Bacteria	Pantoea ananatis PA13	0		0
Bacteria	Pantoea sp. At-9b	0		0
Bacteria	Pantoea vagans C9-1	0		0
Bacteria	Parabacteroides distasonis ATCC 8503	0		0
Bacteria	Parachlamydia acanthamoebae UV-7	18	2789	0.645393
Bacteria	Paracoccus denitrificans PD1222	2	5077	0.0393933
Bacteria	Parvibaculum lavamentivorans DS-1	1	3636	0.0275028
Bacteria	Parvularcula bermudensis HTCC2503	1	2687	0.0372162
Bacteria	Pasteurella multocida 36950	0		0
Bacteria	Pasteurella multocida subsp. multocida str. 3480	1	2223	0.0449843
Bacteria	Pasteurella multocida subsp. multocida str. HN06	1	2265	0.0441501
Bacteria	Pasteurella multocida subsp. multocida str. Pm70	1	2012	0.0497018
Bacteria	Pectobacterium atrosepticum SCRI1043	3	4472	0.0670841
Bacteria	Pectobacterium carotovorum subsp. carotovorum PC1	3	4246	0.0706547
Bacteria	Pectobacterium wasabiae WPP163	0		0
Bacteria	Pediococcus claussenii ATCC BAA-344	0		0
Bacteria	Pediococcus pentosaceus ATCC 25745	0		0
Bacteria	Pedobacter heparinus DSM 2366	3	4252	0.070555
Bacteria	Pedobacter saltans DSM 12145	6	3792	0.158228
Bacteria	Pelagibacterium halotolerans B2	0		0
Bacteria	Pelobacter carbinolicus DSM 2380	0		0
Bacteria	Pelobacter propionicus DSM 2379	1	3804	0.0262881
Bacteria	Pelodictyon phaeoclathratiforme BU-1	0		0
Bacteria	Pelotomaculum thermopropionicum SI	0		0
Bacteria	Persephonella marina EX-H1	4	2051	0.195027
Bacteria	Petrotoga mobilis SJ95	0		0
Bacteria	Phaeobacter gallaeciensis 2.10	1	3723	0.0268601
Bacteria	Phaeobacter gallaeciensis DSM 17395	1	3875	0.0258065
Bacteria	Phenylobacterium zucineum HLK1	0		0
Bacteria	Photobacterium profundum SS9	2	5489	0.0364365
Bacteria	Photorhabdus asymbiotica	1	4415	0.0226501
Bacteria	Photorhabdus luminescens subsp. laumondii TTO1	2	4683	0.0427077
Bacteria	Phycisphaera mikurensis NBRC 102666	4	3282	0.121877
Bacteria	Pirellula staleyi DSM 6068	2	4717	0.0423998
Bacteria	Planctomyces brasiliensis DSM 5305	4	4750	0.0842105
Bacteria	Planctomyces limnophilus DSM 3776	3	4258	0.0704556
Bacteria	Polaromonas naphthalenivorans CJ2	4	4929	0.0811524
Bacteria	Polaromonas sp. JS666	2	5453	0.0366771
Bacteria	Polymorphum gilvum SL003B-26A1	1	4393	0.0227635
Bacteria	Polynucleobacter necessarius subsp. asymbioticus QLW-P1DMWA-1	1	2077	0.0481464
Bacteria	Polynucleobacter necessarius subsp. necessarius STIR1	0		0
Bacteria	Porphyromonas asaccharolytica DSM 20707	0		0
Bacteria	Porphyromonas gingivalis ATCC 33277	0		0
Bacteria	Porphyromonas gingivalis TDC60	0		0
Bacteria	Porphyromonas gingivalis W83	0		0
Bacteria	Prevotella denticola F0289	0		0
Bacteria	Prevotella intermedia 17	2	2266	0.0882613
Bacteria	Prevotella melaninogenica ATCC 25845	2	2296	0.087108
Bacteria	Prevotella ruminicola 23	0		0
Bacteria	Prochlorococcus marinus str. AS9601	0		0
Bacteria	Prochlorococcus marinus str. MIT 9211	0		0
Bacteria	Prochlorococcus marinus str. MIT 9215	0		0
Bacteria	Prochlorococcus marinus str. MIT 9301	0		0
Bacteria	Prochlorococcus marinus str. MIT 9303	0		0
Bacteria	Prochlorococcus marinus str. MIT 9312	0		0
Bacteria	Prochlorococcus marinus str. MIT 9313	0		0
Bacteria	Prochlorococcus marinus str. MIT 9515	0		0
Bacteria	Prochlorococcus marinus str. NATL1A	0		0
Bacteria	Prochlorococcus marinus str. NATL2A	0		0
Bacteria	Prochlorococcus marinus subsp. marinus str. CCMP1375	0		0
Bacteria	Prochlorococcus marinus subsp. pastoris str. CCMP1986	0		0
Bacteria	Propionibacterium acnes 266	0		0
Bacteria	Propionibacterium acnes 6609	0		0
Bacteria	Propionibacterium acnes ATCC 11828	0		0
Bacteria	Propionibacterium acnes KPA171202	0		0
Bacteria	Propionibacterium acnes SK137	0		0
Bacteria	Propionibacterium acnes TypeIA2 P.acn17	0		0
Bacteria	Propionibacterium acnes TypeIA2 P.acn31	0		0
Bacteria	Propionibacterium acnes TypeIA2 P.acn33	0		0
Bacteria	Propionibacterium freudenreichii subsp. shermanii CIRM-BIA1	0		0
Bacteria	Propionibacterium propionicum F0230a	0		0
Bacteria	Prosthecochloris aestuarii DSM 271	0		0
Bacteria	Proteus mirabilis HI4320	0		0
Bacteria	Providencia stuartii MRSN 2154	3	4099	0.0731886
Bacteria	Pseudoalteromonas atlantica T6c	1	4281	0.023359
Bacteria	Pseudoalteromonas haloplanktis TAC125	2	3485	0.0573888
Bacteria	Pseudoalteromonas sp. SM9913	1	3712	0.0269397
Bacteria	Pseudogulbenkiania sp. NH8B	0		0
Bacteria	Pseudomonas aeruginosa DK2	3	5884	0.0509857
Bacteria	Pseudomonas aeruginosa LESB58	3	5925	0.0506329
Bacteria	Pseudomonas aeruginosa M18	3	5684	0.0527797
Bacteria	Pseudomonas aeruginosa NCGM2.S1	3	6269	0.0478545
Bacteria	Pseudomonas aeruginosa PA7	3	6286	0.0477251
Bacteria	Pseudomonas aeruginosa PAO1	3	5571	0.0538503
Bacteria	Pseudomonas aeruginosa UCBPP-PA14	3	5892	0.0509165
Bacteria	Pseudomonas brassicacearum subsp. brassicacearum NFM421	2	6095	0.0328138
Bacteria	Pseudomonas entomophila L48	2	5134	0.038956
Bacteria	Pseudomonas fluorescens A506	2	5267	0.0379723
Bacteria	Pseudomonas fluorescens F113	2	5862	0.034118
Bacteria	Pseudomonas fluorescens Pf0-1	1	5722	0.0174764
Bacteria	Pseudomonas fluorescens SBW25	3	5921	0.0506671
Bacteria	Pseudomonas fulva 12-X	2	4461	0.044833
Bacteria	Pseudomonas mendocina NK-01	0		0
Bacteria	Pseudomonas mendocina ymp	0		0
Bacteria	Pseudomonas protegens Pf-5	5	6108	0.0818599
Bacteria	Pseudomonas putida BIRD-1	1	4960	0.0201613
Bacteria	Pseudomonas putida DOT-T1E	1	5721	0.0174795
Bacteria	Pseudomonas putida F1	1	5250	0.0190476
Bacteria	Pseudomonas putida GB-1	2	5408	0.0369822
Bacteria	Pseudomonas putida KT2440	1	5350	0.0186916
Bacteria	Pseudomonas putida ND6	1	6391	0.015647
Bacteria	Pseudomonas putida S16	2	5218	0.0383289
Bacteria	Pseudomonas putida W619	2	5182	0.0385951
Bacteria	Pseudomonas stutzeri A1501	2	4127	0.0484614
Bacteria	Pseudomonas stutzeri ATCC 17588 = LMG 11199	3	4217	0.0711406
Bacteria	Pseudomonas stutzeri CCUG 29243	1	4300	0.0232558
Bacteria	Pseudomonas stutzeri DSM 10701	2	3815	0.0524246
Bacteria	Pseudomonas stutzeri DSM 4166	2	4301	0.0465008
Bacteria	Pseudomonas syringae pv. phaseolicola 1448A	2	5172	0.0386698
Bacteria	Pseudomonas syringae pv. syringae B728a	3	5089	0.0589507
Bacteria	Pseudomonas syringae pv. tomato str. DC3000	2	5619	0.0355935
Bacteria	Pseudonocardia dioxanivorans CB1190	1	6736	0.0148456
Bacteria	Pseudovibrio sp. FO-BEG1	4	5468	0.0731529
Bacteria	Pseudoxanthomonas spadix BD-a59	4	3149	0.127024
Bacteria	Pseudoxanthomonas suwonensis 11-1	1	3070	0.0325733
Bacteria	Psychrobacter arcticus 273-4	0		0
Bacteria	Psychrobacter cryohalolentis K5	0		0
Bacteria	Psychrobacter sp. PRwf-1	0		0
Bacteria	Psychromonas ingrahamii 37	0		0
Bacteria	Pusillimonas sp. T7-7	2	3773	0.0530082
Bacteria	Rahnella aquatilis CIP 78.65 = ATCC 33071	0		0
Bacteria	Rahnella aquatilis HX2	0		0
Bacteria	Rahnella sp. Y9602	0		0
Bacteria	Ralstonia eutropha H16	3	6626	0.0452762
Bacteria	Ralstonia eutropha JMP134	3	6446	0.0465405
Bacteria	Ralstonia pickettii 12D	2	5361	0.0373065
Bacteria	Ralstonia pickettii 12J	2	4952	0.0403877
Bacteria	Ralstonia solanacearum CFBP2957	3	3221	0.0931388
Bacteria	Ralstonia solanacearum GMI1000	5	5113	0.0977899
Bacteria	Ralstonia solanacearum Po82	5	5016	0.099681
Bacteria	Ralstonia solanacearum PSI07	8	4978	0.160707
Bacteria	Ramlibacter tataouinensis TTB310	3	3880	0.0773196
Bacteria	Renibacterium salmoninarum ATCC 33209	0		0
Bacteria	Rhizobium etli CFN 42	0		0
Bacteria	Rhizobium etli CIAT 652	0		0
Bacteria	Rhizobium leguminosarum bv. trifolii WSM1325	3	7001	0.042851
Bacteria	Rhizobium leguminosarum bv. trifolii WSM2304	0		0
Bacteria	Rhizobium leguminosarum bv. viciae 3841	1	7143	0.0139997
Bacteria	Rhodobacter capsulatus SB 1003	0		0
Bacteria	Rhodobacter sphaeroides 2.4.1	0		0
Bacteria	Rhodobacter sphaeroides ATCC 17025	0		0
Bacteria	Rhodobacter sphaeroides ATCC 17029	0		0
Bacteria	Rhodobacter sphaeroides KD131	0		0
Bacteria	Rhodococcus equi 103S	2	4512	0.0443262
Bacteria	Rhodococcus erythropolis PR4	2	6433	0.0310897
Bacteria	Rhodococcus jostii RHA1	2	9145	0.0218699
Bacteria	Rhodococcus opacus B4	1	8197	0.0121996
Bacteria	Rhodoferax ferrireducens T118	2	4417	0.0452796
Bacteria	Rhodomicrobium vannielii ATCC 17100	0		0
Bacteria	Rhodopirellula baltica SH 1	9	7325	0.122867
Bacteria	Rhodopseudomonas palustris BisA53	0		0
Bacteria	Rhodopseudomonas palustris BisB18	0		0
Bacteria	Rhodopseudomonas palustris BisB5	0		0
Bacteria	Rhodopseudomonas palustris CGA009	0		0
Bacteria	Rhodopseudomonas palustris DX-1	0		0
Bacteria	Rhodopseudomonas palustris HaA2	0		0
Bacteria	Rhodopseudomonas palustris TIE-1	1	5246	0.0190621
Bacteria	Rhodospirillum centenum SW	1	4003	0.0249813
Bacteria	Rhodospirillum photometricum DSM 122	2	3281	0.060957
Bacteria	Rhodospirillum rubrum ATCC 11170	0		0
Bacteria	Rhodospirillum rubrum F11	0		0
Bacteria	Rhodothermus marinus DSM 4252	0		0
Bacteria	Rhodothermus marinus SG0.5JP17-172	0		0
Bacteria	Rickettsia africae ESF-5	4	1041	0.384246
Bacteria	Rickettsia akari str. Hartford	7	1258	0.556439
Bacteria	Rickettsia australis str. Cutlack	7	1261	0.555115
Bacteria	Rickettsia bellii OSU 85-389	28	1475	1.89831
Bacteria	Rickettsia bellii RML369-C	27	1429	1.88943
Bacteria	Rickettsia canadensis str. CA410	4	1016	0.393701
Bacteria	Rickettsia canadensis str. McKiel	4	1090	0.366972
Bacteria	Rickettsia conorii str. Malish 7	6	1374	0.436681
Bacteria	Rickettsia felis URRWXCal2	24	1512	1.5873
Bacteria	Rickettsia heilongjiangensis 054	11	1297	0.848111
Bacteria	Rickettsia japonica YH	8	971	0.823893
Bacteria	Rickettsia massiliae MTU5	5	980	0.510204
Bacteria	Rickettsia massiliae str. AZT80	6	1207	0.4971
Bacteria	Rickettsia montanensis str. OSU 85-930	6	1217	0.493016
Bacteria	Rickettsia parkeri str. Portsmouth	9	1318	0.682853
Bacteria	Rickettsia peacockii str. Rustic	3	947	0.31679
Bacteria	Rickettsia philipii str. 364D	11	1344	0.818452
Bacteria	Rickettsia prowazekii Rp22	3	950	0.315789
Bacteria	Rickettsia prowazekii str. BuV67-CWPP	3	843	0.355872
Bacteria	Rickettsia prowazekii str. Chernikova	3	845	0.35503
Bacteria	Rickettsia prowazekii str. Dachau	3	839	0.357569
Bacteria	Rickettsia prowazekii str. GvV257	1	829	0.120627
Bacteria	Rickettsia prowazekii str. Katsinyian	3	844	0.35545
Bacteria	Rickettsia prowazekii str. Madrid E	3	835	0.359281
Bacteria	Rickettsia prowazekii str. RpGvF24	1	834	0.119904
Bacteria	Rickettsia rhipicephali str. 3-7-female6-CWPP	7	1266	0.552923
Bacteria	Rickettsia rickettsii str. 'Sheila Smith'	6	1343	0.446761
Bacteria	Rickettsia rickettsii str. Arizona	6	1343	0.446761
Bacteria	Rickettsia rickettsii str. Brazil	6	1332	0.45045
Bacteria	Rickettsia rickettsii str. Colombia	6	1350	0.444444
Bacteria	Rickettsia rickettsii str. Hauke	6	1340	0.447761
Bacteria	Rickettsia rickettsii str. Hino	6	1335	0.449438
Bacteria	Rickettsia rickettsii str. Hlp#2	6	1308	0.458716
Bacteria	Rickettsia rickettsii str. Iowa	6	1384	0.433526
Bacteria	Rickettsia slovaca 13-B	5	1112	0.44964
Bacteria	Rickettsia slovaca str. D-CWPP	7	1347	0.519673
Bacteria	Rickettsia typhi str. B9991CWPP	2	839	0.238379
Bacteria	Rickettsia typhi str. TH1527	2	838	0.238663
Bacteria	Rickettsia typhi str. Wilmington	2	837	0.238949
Bacteria	Riemerella anatipestifer ATCC 11845 = DSM 15868	2	1972	0.10142
Bacteria	Riemerella anatipestifer ATCC 11845 = DSM 15868	2	1941	0.10304
Bacteria	Riemerella anatipestifer RA-GD	2	1985	0.100756
Bacteria	Robiginitalea biformata HTCC2501	5	3209	0.155812
Bacteria	Roseburia hominis A2-183	0		0
Bacteria	Roseiflexus castenholzii DSM 13941	0		0
Bacteria	Roseiflexus sp. RS-1	0		0
Bacteria	Roseobacter denitrificans OCh 114	0		0
Bacteria	Roseobacter litoralis Och 149	0		0
Bacteria	Rothia dentocariosa ATCC 17931	1	2217	0.045106
Bacteria	Rothia mucilaginosa DY-18	0		0
Bacteria	Rubrivivax gelatinosus IL144	2	4693	0.0426167
Bacteria	Rubrobacter xylanophilus DSM 9941	0		0
Bacteria	Ruegeria pomeroyi DSS-3	1	4252	0.0235183
Bacteria	Ruegeria sp. TM1040	1	3864	0.0258799
Bacteria	Ruminococcus albus 7	1	3872	0.0258264
Bacteria	Runella slithyformis DSM 19594	2	5774	0.034638
Bacteria	Saccharomonospora viridis DSM 43017	3	3828	0.0783699
Bacteria	Saccharophagus degradans 2-40	1	4007	0.0249563
Bacteria	Saccharopolyspora erythraea NRRL 2338	0		0
Bacteria	Salinibacter ruber DSM 13855	1	2833	0.0352983
Bacteria	Salinibacter ruber M8	1	3257	0.0307031
Bacteria	Salinispora arenicola CNS-205	0		0
Bacteria	Salinispora tropica CNB-440	0		0
Bacteria	Salmonella bongori NCTC 12419	0		0
Bacteria	Salmonella enterica subsp. arizonae serovar 62:z4,z23:-- str. RSK2980	0		0
Bacteria	Salmonella enterica subsp. enterica serovar Agona str. SL483	0		0
Bacteria	Salmonella enterica subsp. enterica serovar Choleraesuis str. SC-B67	0		0
Bacteria	Salmonella enterica subsp. enterica serovar Dublin str. CT_02021853	0		0
Bacteria	Salmonella enterica subsp. enterica serovar Enteritidis str. P125109	0		0
Bacteria	Salmonella enterica subsp. enterica serovar Gallinarum str. 287/91	0		0
Bacteria	Salmonella enterica subsp. enterica serovar Gallinarum/pullorum str. RKS5078	0		0
Bacteria	Salmonella enterica subsp. enterica serovar Heidelberg str. B182	0		0
Bacteria	Salmonella enterica subsp. enterica serovar Heidelberg str. SL476	0		0
Bacteria	Salmonella enterica subsp. enterica serovar Newport str. SL254	0		0
Bacteria	Salmonella enterica subsp. enterica serovar Paratyphi A str. AKU_12601	0		0
Bacteria	Salmonella enterica subsp. enterica serovar Paratyphi A str. ATCC 9150	0		0
Bacteria	Salmonella enterica subsp. enterica serovar Paratyphi B str. SPB7	0		0
Bacteria	Salmonella enterica subsp. enterica serovar Schwarzengrund str. CVM19633	1	4628	0.0216076
Bacteria	Salmonella enterica subsp. enterica serovar Typhi str. CT18	0		0
Bacteria	Salmonella enterica subsp. enterica serovar Typhi str. P-stx-12	0		0
Bacteria	Salmonella enterica subsp. enterica serovar Typhi str. Ty2	0		0
Bacteria	Salmonella enterica subsp. enterica serovar Typhimurium str. 14028S	0		0
Bacteria	Salmonella enterica subsp. enterica serovar Typhimurium str. 798	0		0
Bacteria	Salmonella enterica subsp. enterica serovar Typhimurium str. D23580	0		0
Bacteria	Salmonella enterica subsp. enterica serovar Typhimurium str. LT2	0		0
Bacteria	Salmonella enterica subsp. enterica serovar Typhimurium str. SL1344	0		0
Bacteria	Salmonella enterica subsp. enterica serovar Typhimurium str. ST4/74	0		0
Bacteria	Salmonella enterica subsp. enterica serovar Typhimurium str. T000240	0		0
Bacteria	Salmonella enterica subsp. enterica serovar Typhimurium str. UK-1	0		0
Bacteria	Sanguibacter keddieii DSM 10542	0		0
Bacteria	Saprospira grandis str. Lewin	2	4251	0.0470478
Bacteria	Sebaldella termitidis ATCC 33386	2	4150	0.0481928
Bacteria	secondary endosymbiont of Ctenarytaina eucalypti	0		0
Bacteria	Segniliparus rotundus DSM 44985	2	3006	0.0665336
Bacteria	Selenomonas ruminantium subsp. lactilytica TAM6421	0		0
Bacteria	Selenomonas sputigena ATCC 35185	0		0
Bacteria	Serratia plymuthica AS9	1	4952	0.0201939
Bacteria	Serratia proteamaculans 568	0		0
Bacteria	Serratia sp. AS12	1	4952	0.0201939
Bacteria	Serratia sp. AS13	1	4951	0.0201979
Bacteria	Serratia symbiotica str. 'Cinara cedri'	0		0
Bacteria	Shewanella amazonensis SB2B	2	3645	0.0548697
Bacteria	Shewanella baltica BA175	3	4344	0.0690608
Bacteria	Shewanella baltica OS117	2	4668	0.0428449
Bacteria	Shewanella baltica OS155	2	4489	0.0445534
Bacteria	Shewanella baltica OS185	1	4394	0.0227583
Bacteria	Shewanella baltica OS195	2	4688	0.0426621
Bacteria	Shewanella baltica OS223	0		0
Bacteria	Shewanella baltica OS678	2	4536	0.0440917
Bacteria	Shewanella denitrificans OS217	2	3754	0.0532765
Bacteria	Shewanella frigidimarina NCIMB 400	3	4029	0.0744602
Bacteria	Shewanella halifaxensis HAW-EB4	3	4278	0.0701262
Bacteria	Shewanella loihica PV-4	1	3859	0.0259134
Bacteria	Shewanella oneidensis MR-1	2	4467	0.0447728
Bacteria	Shewanella pealeana ATCC 700345	2	4241	0.0471587
Bacteria	Shewanella piezotolerans WP3	2	4911	0.0407249
Bacteria	Shewanella putrefaciens 200	1	4179	0.0239292
Bacteria	Shewanella putrefaciens CN-32	1	3972	0.0251762
Bacteria	Shewanella sediminis HAW-EB3	2	4497	0.0444741
Bacteria	Shewanella sp. ANA-3	0		0
Bacteria	Shewanella sp. MR-4	2	3924	0.0509684
Bacteria	Shewanella sp. MR-7	0		0
Bacteria	Shewanella sp. W3-18-1	0		0
Bacteria	Shewanella violacea DSS12	1	4346	0.0230097
Bacteria	Shewanella woodyi ATCC 51908	5	4880	0.102459
Bacteria	Shigella boydii CDC 3083-94	3	4557	0.0658328
Bacteria	Shigella boydii Sb227	2	4281	0.0467181
Bacteria	Shigella dysenteriae Sd197	3	4501	0.0666519
Bacteria	Shigella flexneri 2002017	4	4703	0.0850521
Bacteria	Shigella flexneri 2a str. 2457T	0		0
Bacteria	Shigella flexneri 2a str. 301	3	4438	0.067598
Bacteria	Shigella flexneri 5 str. 8401	0		0
Bacteria	Shigella sonnei 53G	5	5412	0.0923873
Bacteria	Shigella sonnei Ss046	3	4470	0.0671141
Bacteria	Sideroxydans lithotrophicus ES-1	6	2980	0.201342
Bacteria	Simkania negevensis Z	13	2518	0.516283
Bacteria	Sinorhizobium fredii HH103	2	6166	0.0324359
Bacteria	Sinorhizobium fredii NGR234	2	6363	0.0314317
Bacteria	Sinorhizobium fredii USDA 257	0		0
Bacteria	Sinorhizobium medicae WSM419	2	6213	0.0321906
Bacteria	Sinorhizobium meliloti 1021	1	6218	0.0160823
Bacteria	Sinorhizobium meliloti AK83	1	6510	0.015361
Bacteria	Sinorhizobium meliloti BL225C	1	6354	0.0157381
Bacteria	Sinorhizobium meliloti SM11	1	7093	0.0140984
Bacteria	Slackia heliotrinireducens DSM 20476	4	2766	0.144613
Bacteria	Sodalis glossinidius str. 'morsitans'	1	2516	0.0397456
Bacteria	Solibacillus silvestris StLB046	0		0
Bacteria	Solitalea canadensis DSM 3403	6	4310	0.139211
Bacteria	Sorangium cellulosum 'So ce 56'	0		0
Bacteria	Sphaerobacter thermophilus DSM 20745	0		0
[truncated: 490 more rows]
