# Supplementary material for: Ankyrin domains across the Tree of Life
Source: PeerJ. 2014 Feb 6;2:e264. doi: 10.7717/peerj.264 (PMC3932732; doi:10.7717/peerj.264)
Supplement: Supplemental Information 3 [file peerj-02-264-s003.xlsx]

## Sheet: Sheet1
Strain	Class	NCBI Reference Sequence
Granulicella mallensis MP5ACTX8	Acidobacteriia	NR_074298.1
Modestobacter marinus	Actinobacteria	NR_074479
Bartonella bacilliformis KC583	Alphaproteobacteria	NR_074203.1
Hydrogenobacter thermophilus TK-6	Aquificae	NR_075004.1
Lactobacillus acidophilus NCFM	Bacilli	NR_075045.1
Bacteroides helcogenes P 36-108	Bacteroidia	NR_074546.1
Burkholderia phytofirmans PsJN	Betaproteobacteria	NR_102845.1
Chlamydia muridarum Nigg	Chlamydiia	NR_074982.1
Chlorobium luteolum DSM 273	Chlorobia	NR_074096.1
Thermosynechococcus elongatus BP-1	Chroococcales	NR_074328.1
Anaerococcus prevotii DSM 20548	Clostridia	NR_074575.1
Spirosoma linguale DSM 74	Cytophagia	NR_074369.1
Thermus scotoductus SA-01	Deinococci	NR_074428.1
Pelobacter propionicus DSM 2379	Deltaproteobacteria	NR_074975.1
Helicobacter felis ATCC 49179	Epsilonproteobacteria	M57398.2
Croceibacter atlanticus HTCC2559	Flavobacteriia	NR_074636.1
Leptotrichia buccalis C-1013-b	Fusobacteriia	NR_074440.1
Vibrio fischeri ES114	Gammaproteobacteria	NR_074990.1
Mycoplasma pneumoniae FH	Mollicutes	NR_041751.1
Acidaminococcus intestini RyC-MR95	Negativicutes	NR_074306
Planctomyces limnophilus DSM 3776	Planctomycetia	NR_074670.1
Pedobacter heparinus DSM 2366	Sphingobacteriia	NR_074519.1
Borrelia afzelii PKo	Spirochaetia	NR_074840.1
Thermosipho africanus TCF52B	Thermotogae	NR_102773.1
